# Supplementary material for: Synthesis and Development of N-2,5-Dimethylphenylthioureido Acid Derivatives as Scaffolds for New Antimicrobial Candidates Targeting Multidrug-Resistant Gram-Positive Pathogens
Source: MDPI journal article supplement (doi:10.3390/antibiotics12020220), 2023-01-20
Supplement: s1 [file s1]

# Synthesis and Development of *N*-2,5-Dimethylphenylthioureido Acid Derivatives as Scaffolds for New Antimicrobial Candidates Targeting Multi-Drug-Resistant Gram-Positive Pathogens

Povilas Kavaliauskas <sup>1,2,3,4</sup>, Birutė Grybaitė <sup>1</sup>, Rita Vaickelionienė <sup>1</sup>, Birutė Sapijanskaitė-Banevič <sup>1</sup>, Kazimieras Anusevičius <sup>1\*</sup>, Agnė Kriaučiūnaitė <sup>1</sup>, Gabrielė Smailienė <sup>1</sup>, Vidmantas Petraitis <sup>2,4</sup>, Rūta Petraitienė <sup>2,4</sup>, Ethan Naing <sup>2</sup>, Andrew Garcia <sup>3</sup>, and Vytautas Mickevičius <sup>1</sup>

<sup>1</sup> Department of Organic Chemistry, Kaunas University of Technology, Radvilėnų Rd. 19, LT-50254 Kaunas, Lithuania

<sup>2</sup> Weill Cornell Medicine of Cornell University, 527 East 68th Street, New York, NY 10065, USA

<sup>3</sup> Institute for Genome Sciences, School of Medicine, University of Maryland, 655 W. Baltimore Street, Baltimore, MD 21201, USA

<sup>4</sup> Institute of Infectious Diseases and Pathogenic Microbiology, Birštono Str. 38A, LT-59116 Prienai, Lithuania

\* Correspondence: kazimieras.anusevicius@ktu.lt; Tel.: +370-646 21841

NMR Spectra (1-17, in DMSO-*d*<sub>6</sub> or CDCl<sub>3</sub>, Figures S1-S66)

3-[Carbamothioyl(2,5-dimethylphenyl)amino]propanoic acid (**1**)

**Figure S1.**  $^1\text{H}$  NMR of compound **1**. Additional acetic acid peaks at 1.96 ppm in Figure S1 and 20.92; 176.47 ppm in Figure S2 are observed and identified based on chemical shifts reported in the publication [1,2].

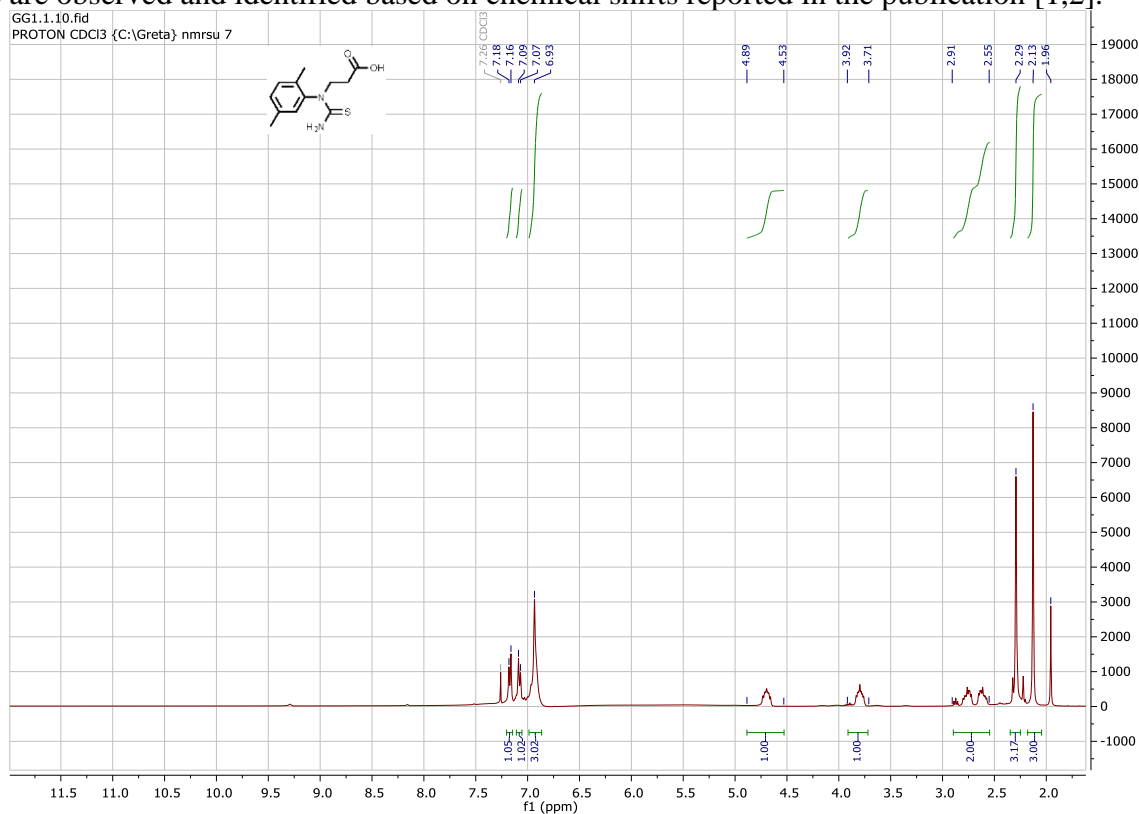

**Figure S2.**  $^{13}\text{C}$  NMR of compound **1**.

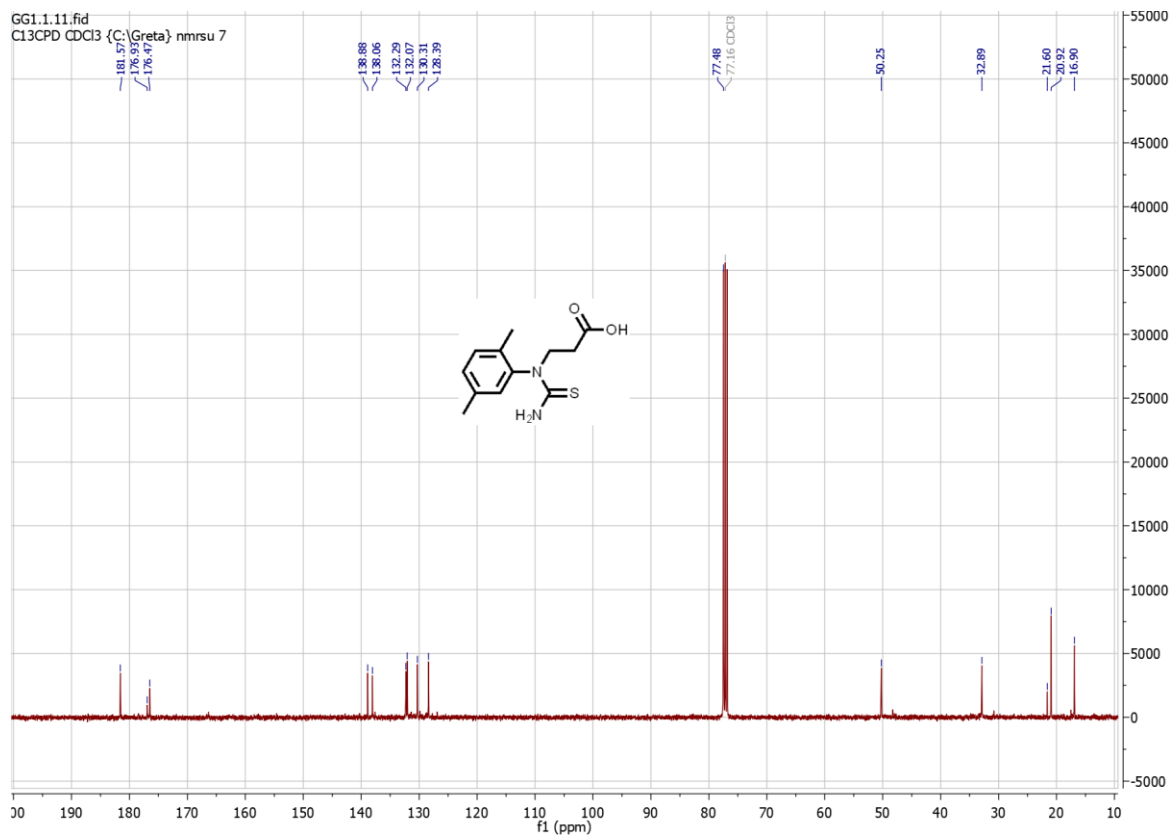

3-[(2,5-Dimethylphenyl)(4-oxo-4,5-dihydro-1,3-thiazol-2-yl)amino]propanoic acid (**2**)  
**Figure S3.** <sup>1</sup>H NMR of compound **2**.

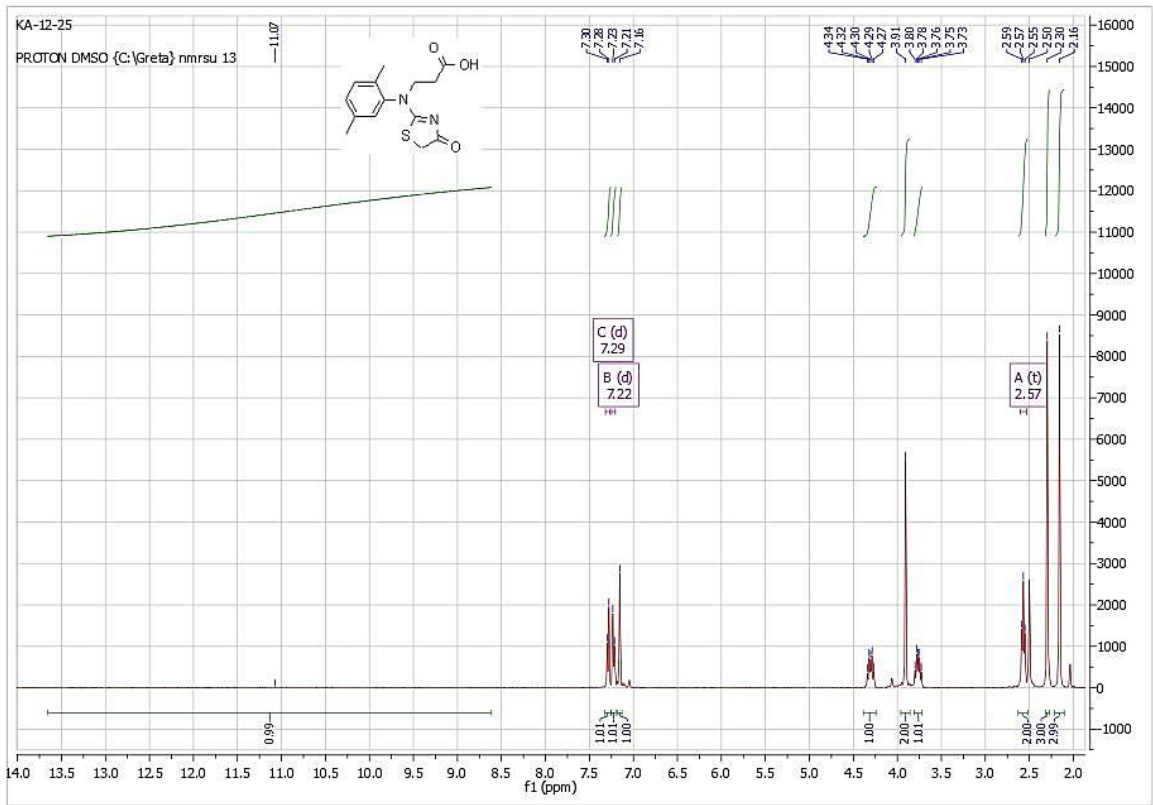

**Figure S4.** <sup>13</sup>C NMR of compound **2**.

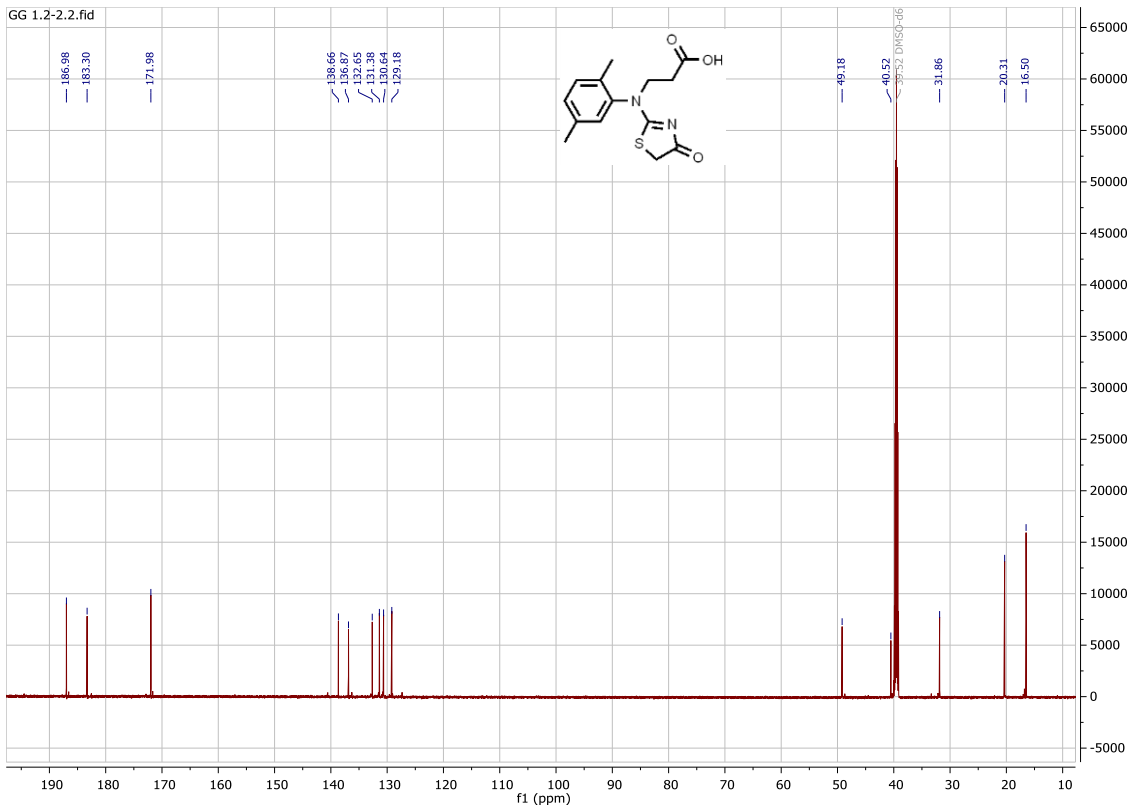

3-[(2,5-Dimethylphenyl)(1,3-thiazol-2-yl)amino]propanoic acid (**3a**)

**Figure S5.**  $^1\text{H}$  NMR of compound **3a**. A broad peak for water at 3.33 ppm is observed in Figure S5 and identified by chemical shifts reported in the publication [1,2].

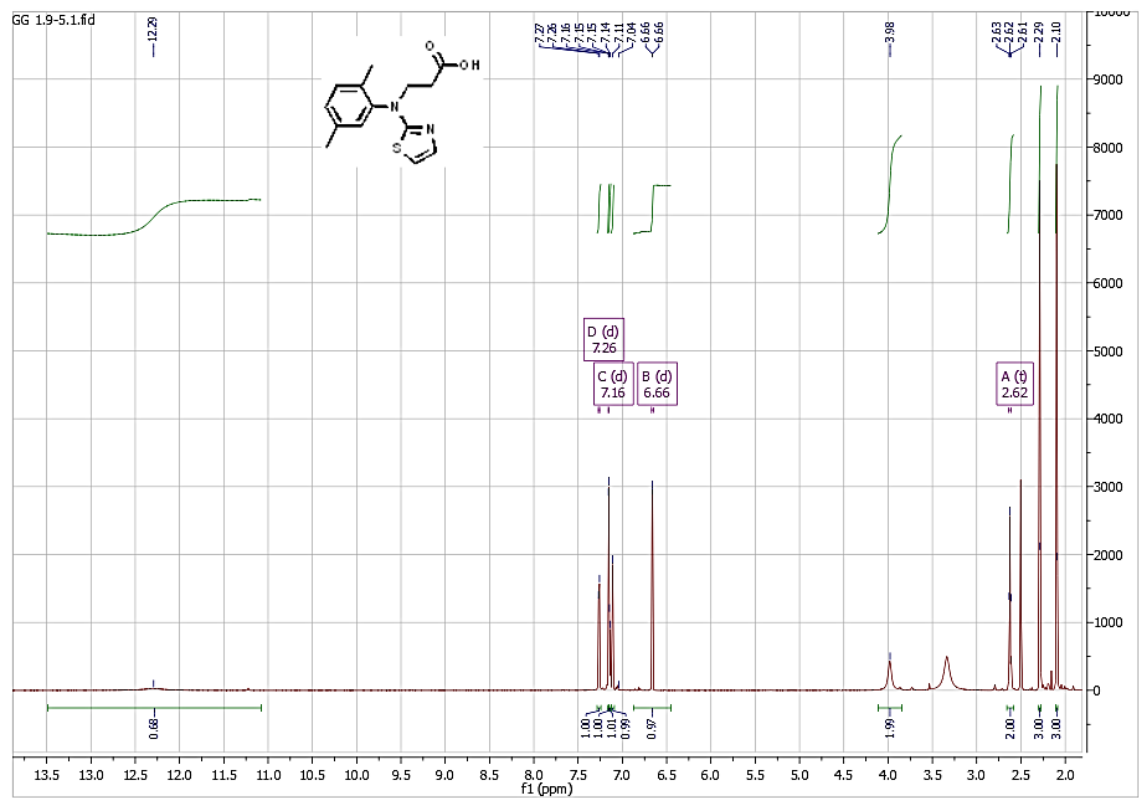

**Figure S6.**  $^{13}\text{C}$  NMR of compound **3a**.

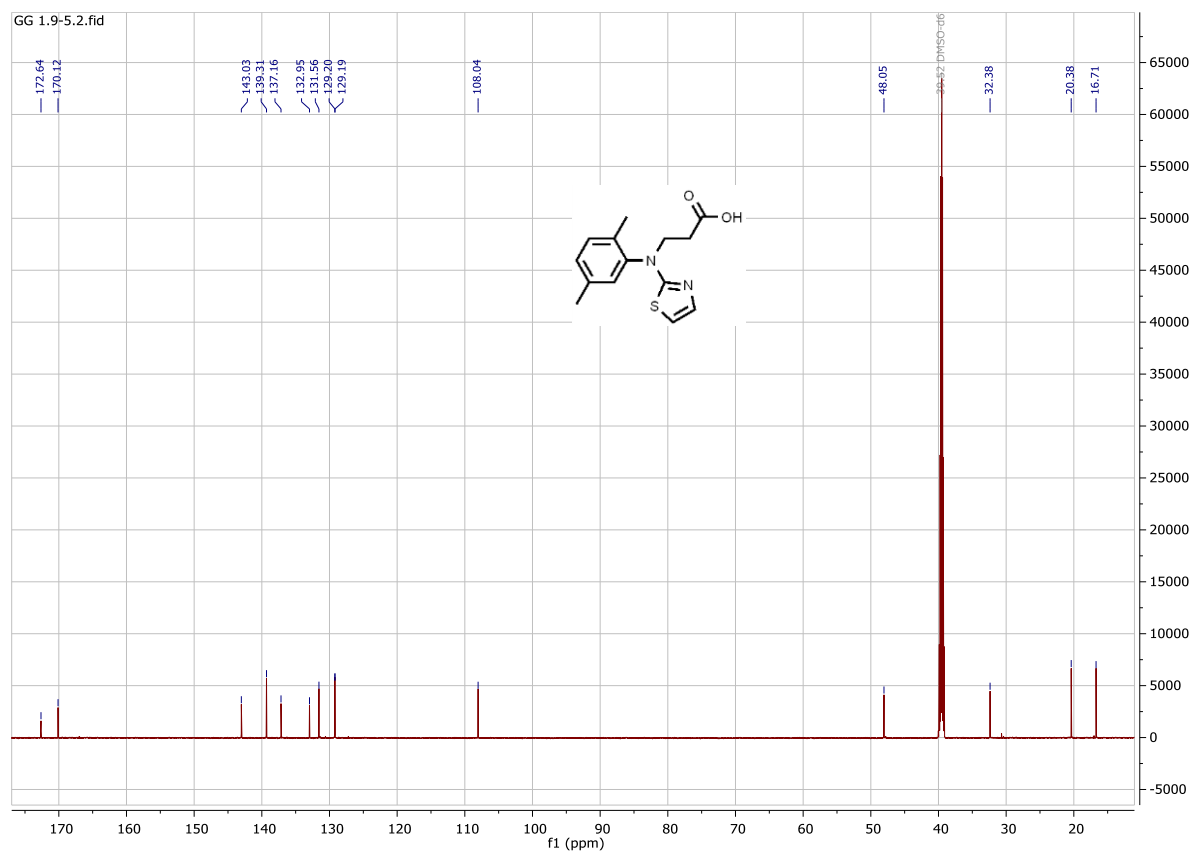

3-[(2,5-Dimethylphenyl)(4-methyl-1,3-thiazol-2-yl)amino]propanoic acid (**3b**)  
Figure S7. <sup>1</sup>H NMR of compound **3b**.

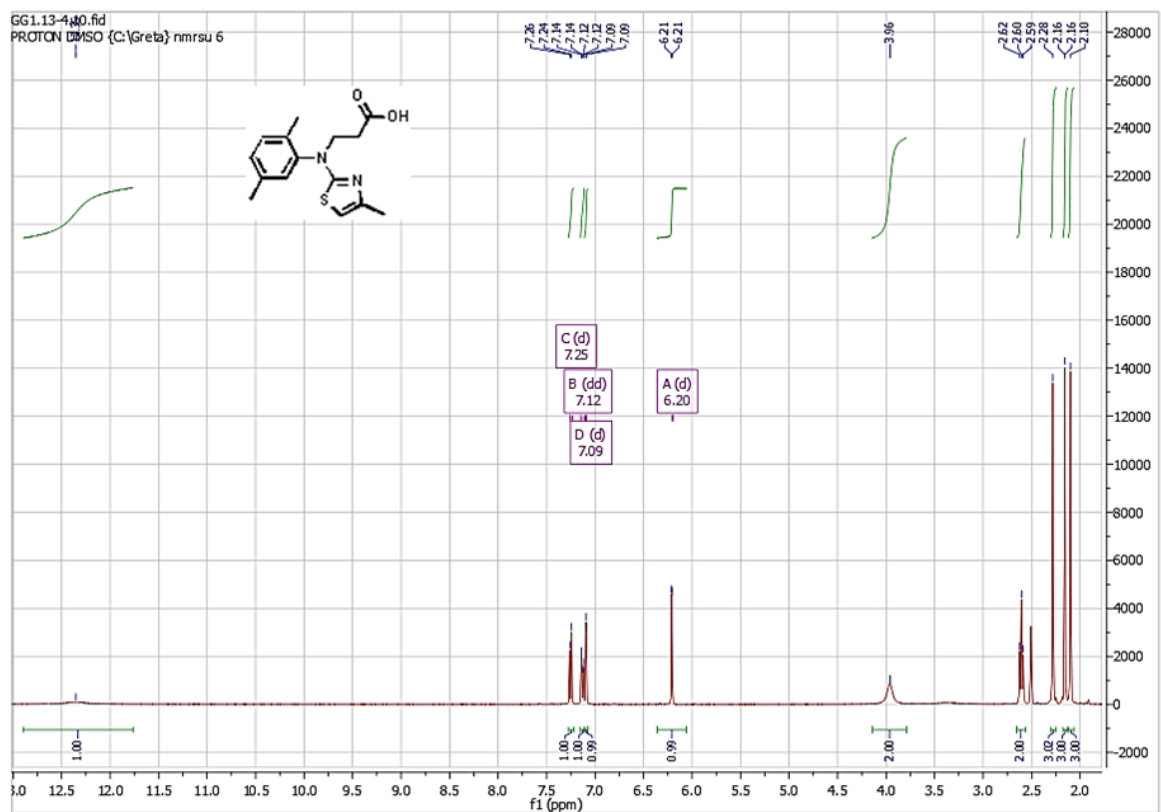

Figure S8. <sup>13</sup>C NMR of compound **3b**.

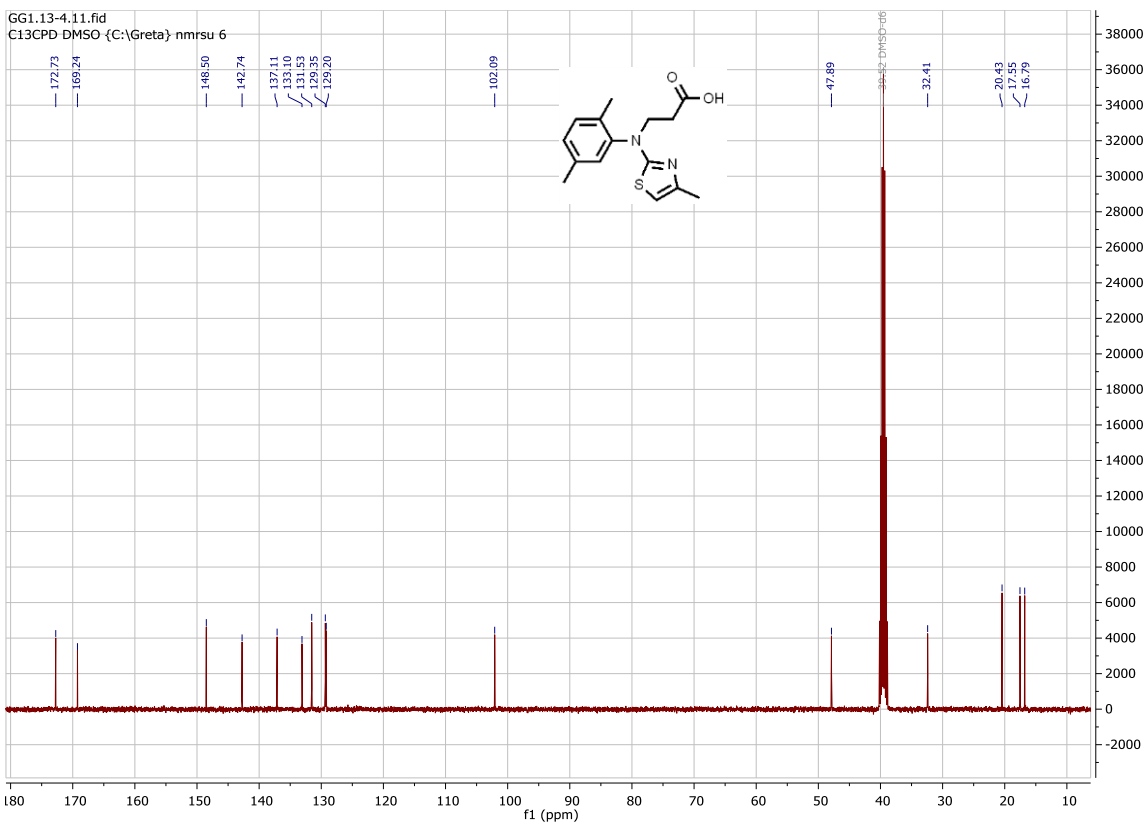

General synthesis of compounds 3c-k  
3-[(2,5-Dimethylphenyl)(4-phenyl-1,3-thiazol-2-yl)amino]propanoic acid (3c)  
Figure S9. <sup>1</sup>H NMR of compound 3c.

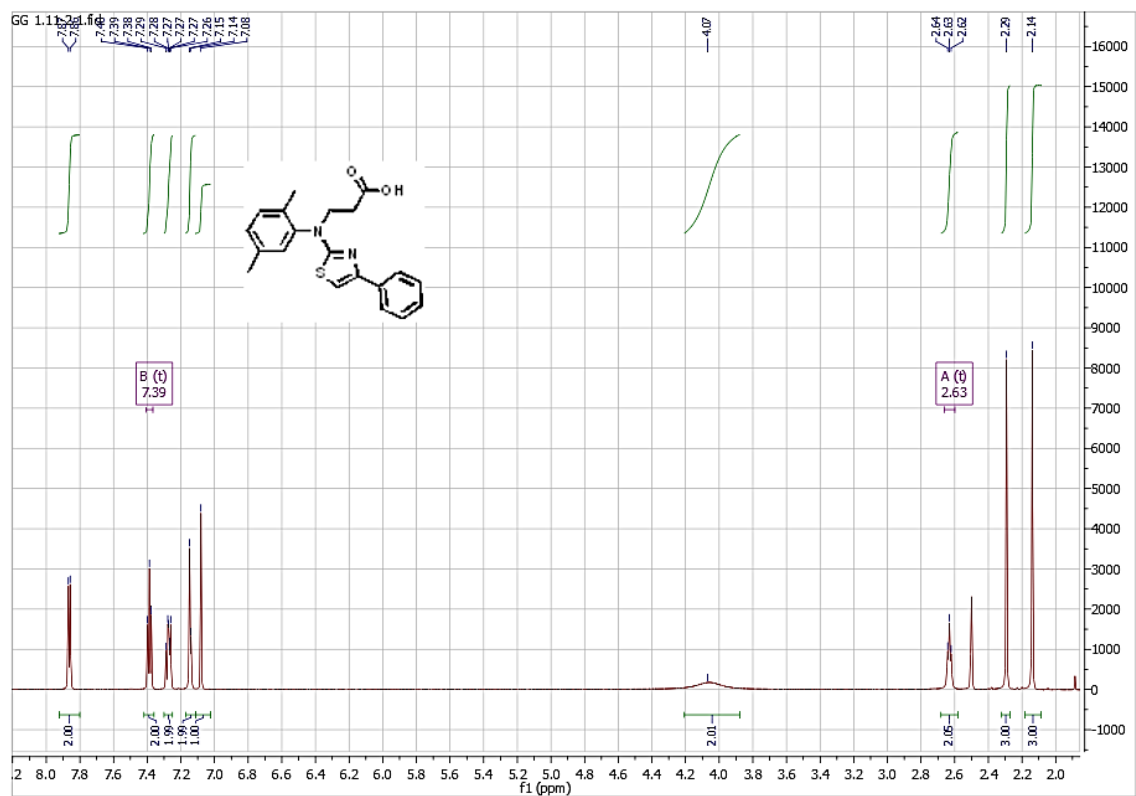

Figure S10. <sup>13</sup>C NMR of compound 3c.

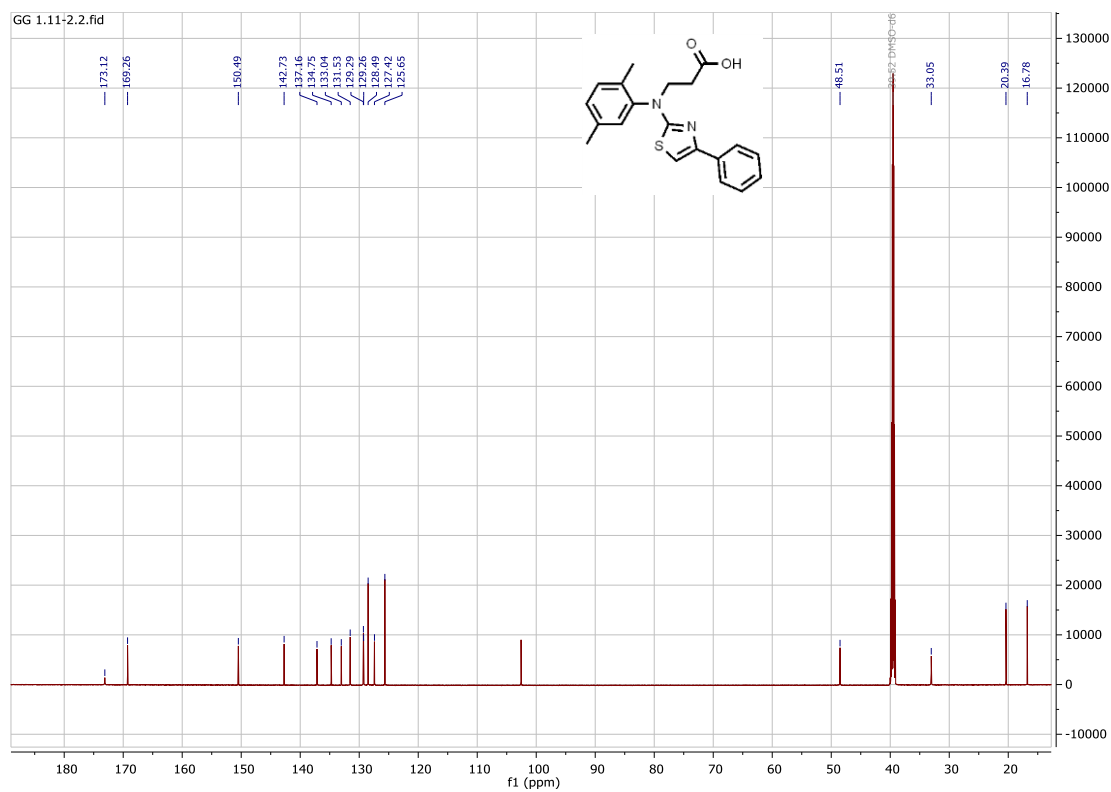

3-((2,5-Dimethylphenyl)[4-(4-fluorophenyl)-1,3-thiazol-2-yl]amino)propanoic acid (**3d**)  
Figure S11. <sup>1</sup>H NMR of compound **3d**.

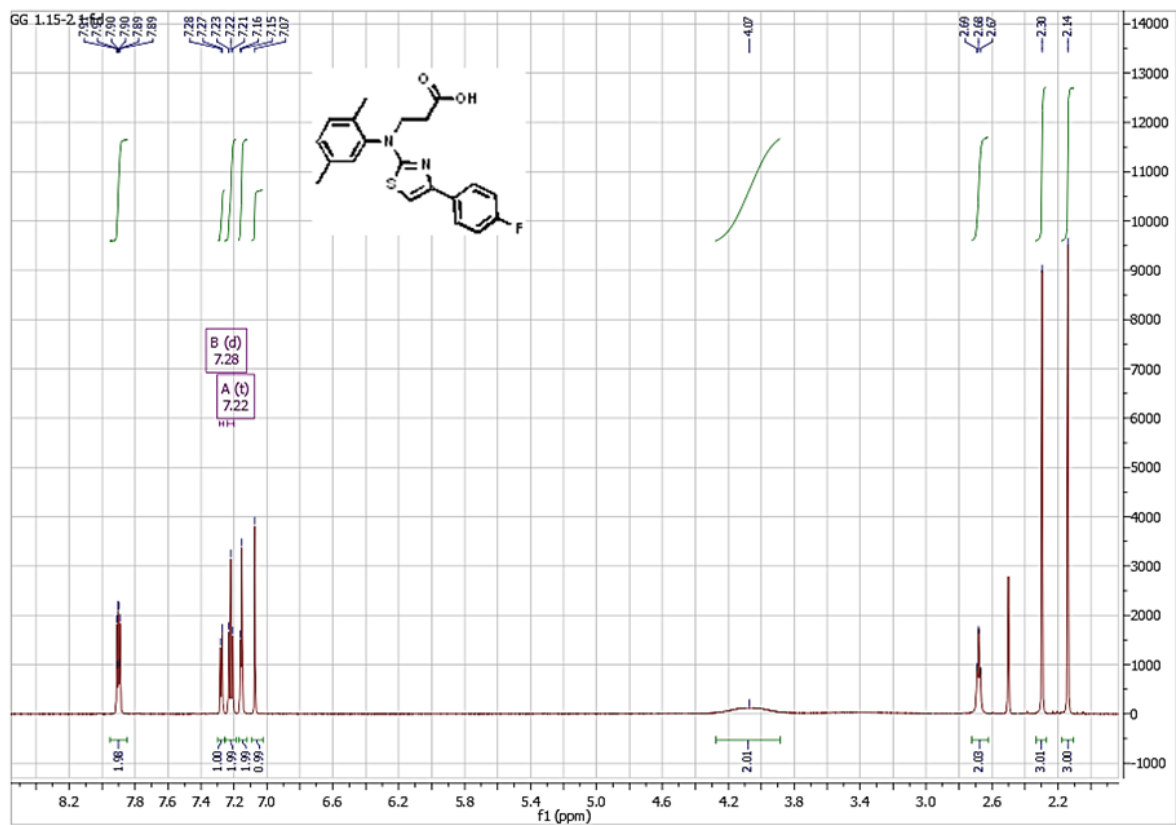

Figure S12. <sup>13</sup>C NMR of compound **3d**.

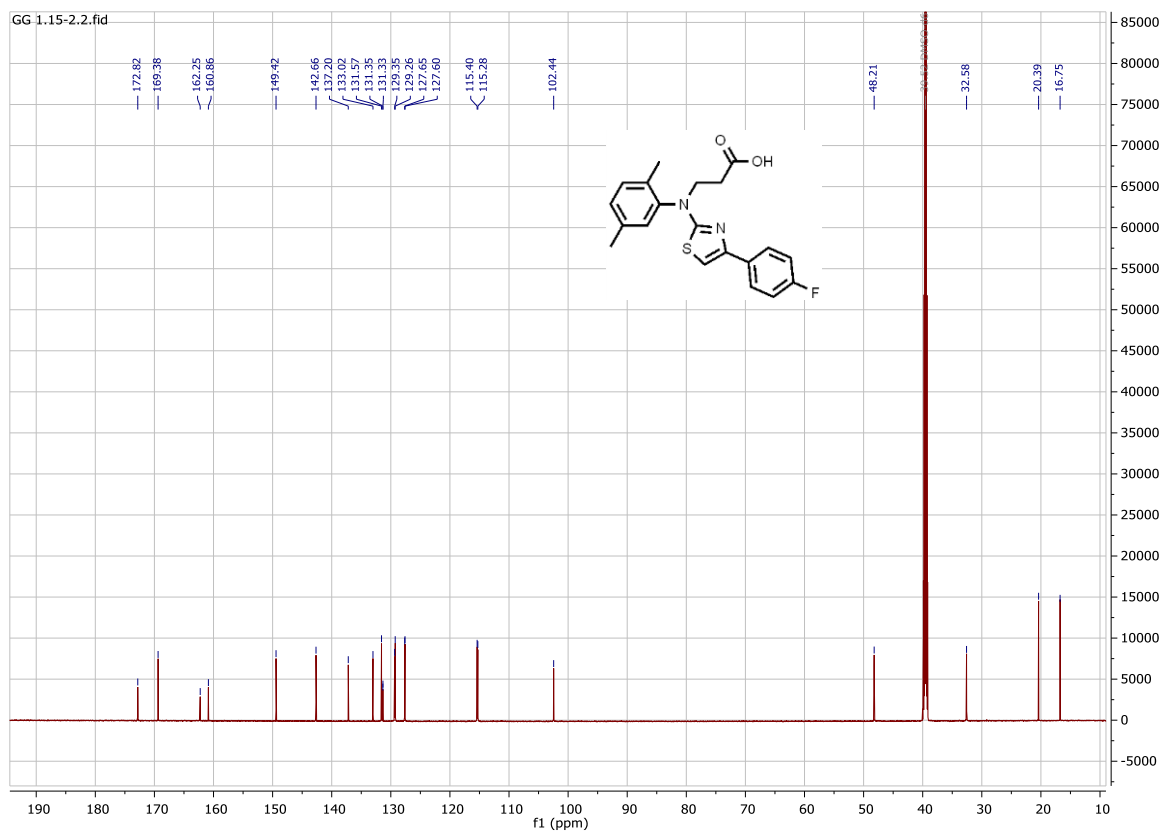

3-[[4-(4-Cyanophenyl)-1,3-thiazol-2-yl](2,5-dimethylphenyl)amino]propanoic acid (**3e**)

**Figure S13.**  $^1\text{H}$  NMR of compound **3e**. A broad peak at 3.33 ppm for water is observed in Figure S13 and identified by chemical shifts reported in the publication [1,2].

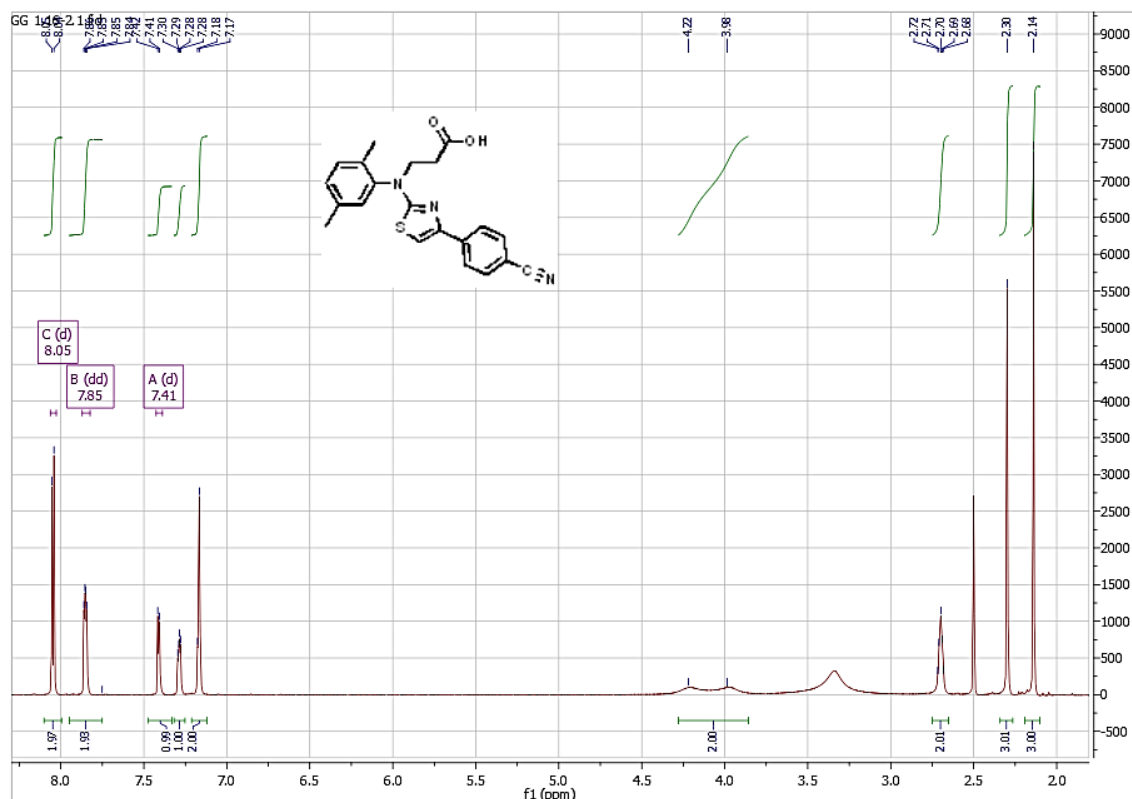

**Figure S14.**  $^{13}\text{C}$  NMR of compound **3e**.

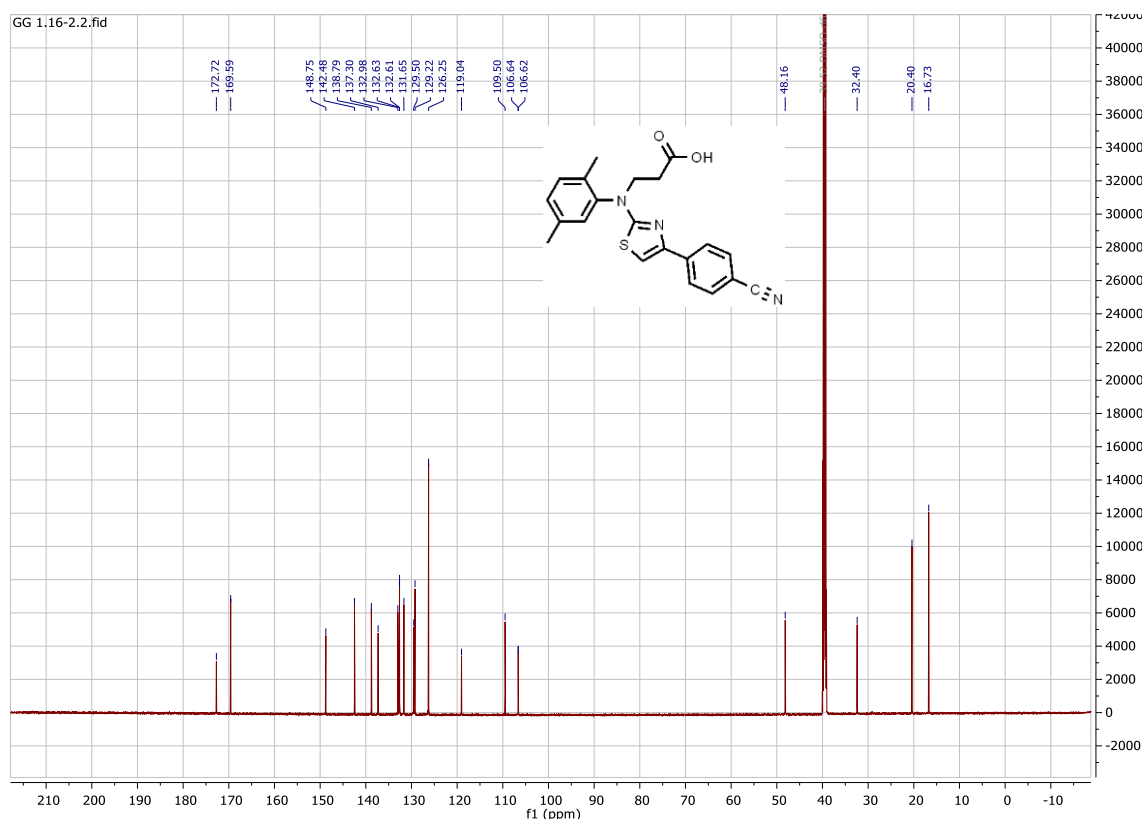

3-[[4-(4-Chlorophenyl)-1,3-thiazol-2-yl](2,5-dimethylphenyl)amino]propanoic acid (**3f**)  
**Figure S15.** <sup>1</sup>H NMR of compound **3f**.

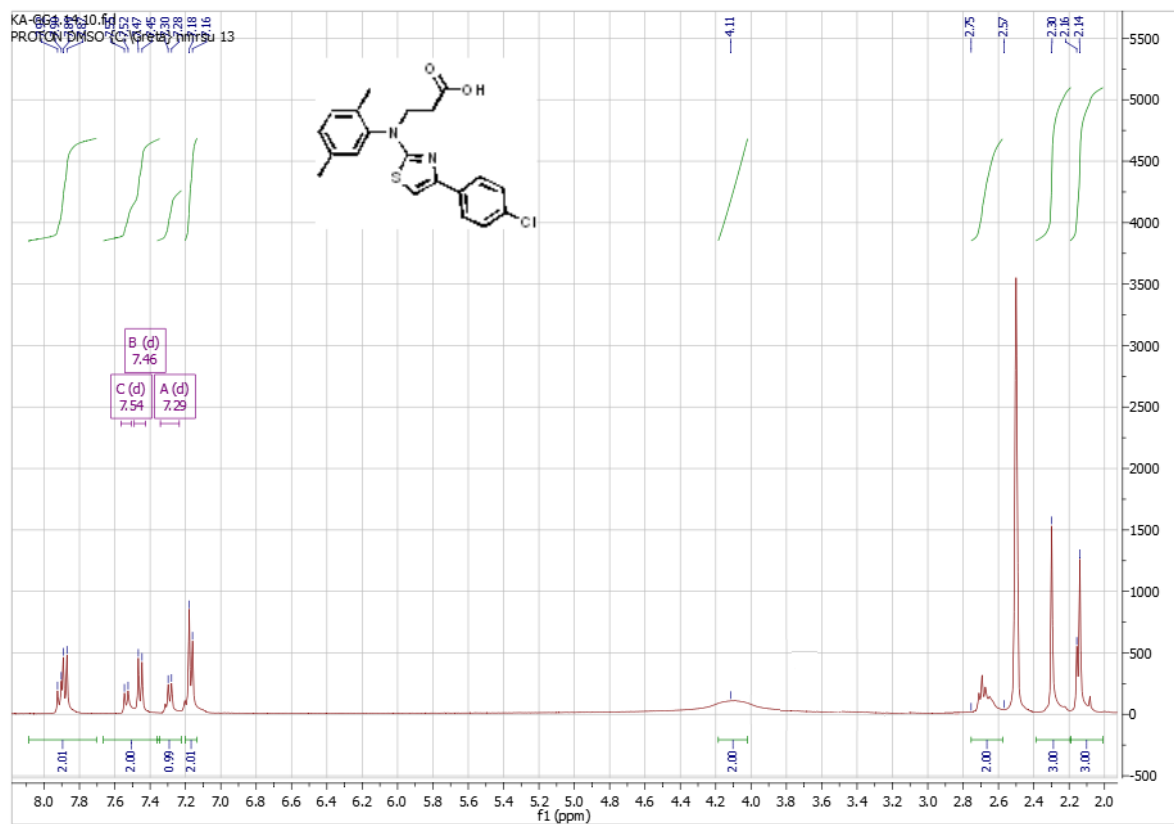

**Figure S16.** <sup>13</sup>C NMR of compound **3f**.

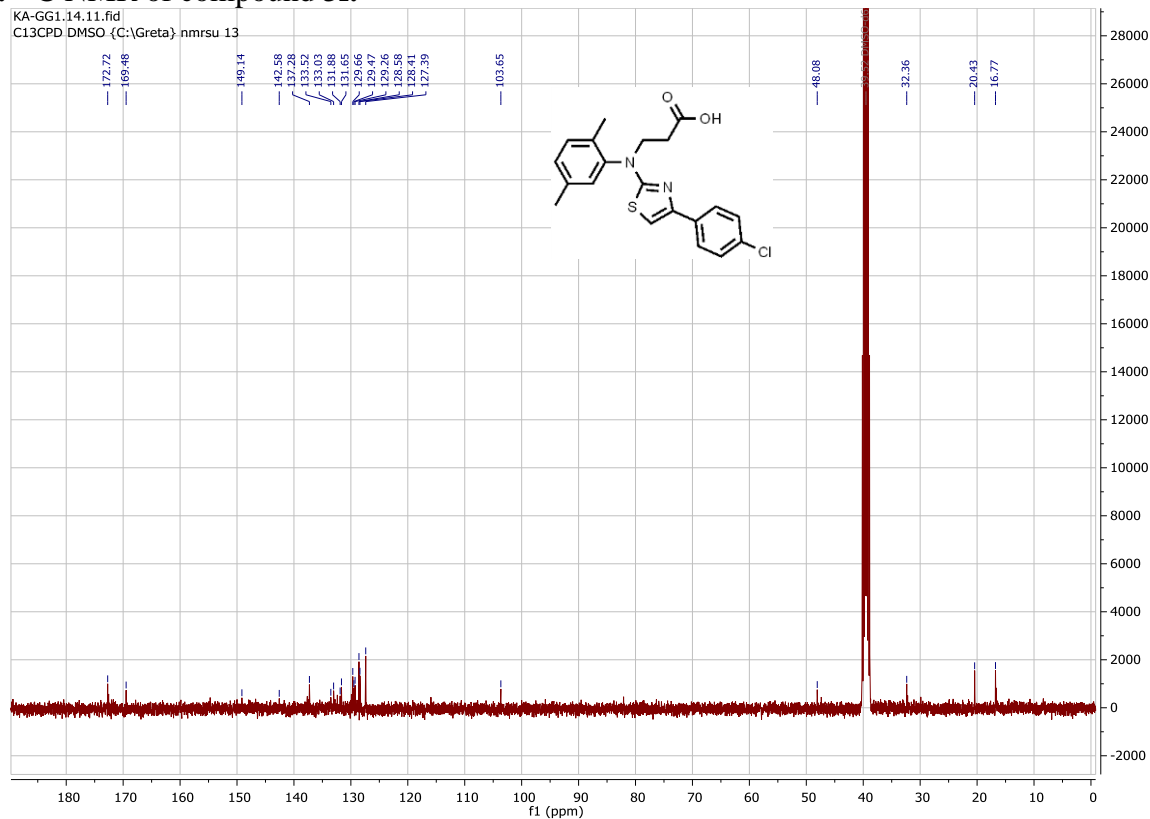

3-((2,5-Dimethylphenyl)[4-(4-nitrophenyl)-1,3-thiazol-2-yl]amino)propanoic acid (**3g**)

**Figure S17.**  $^1\text{H}$  NMR of compound **3g**.

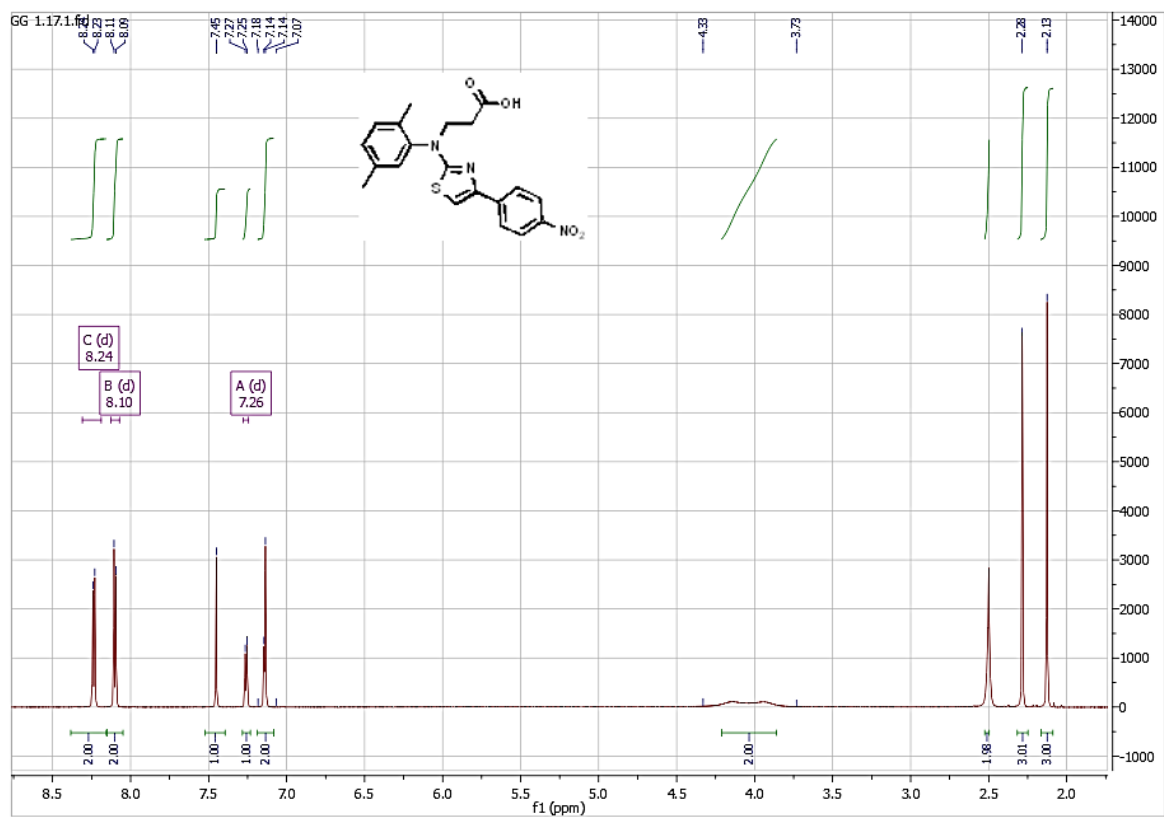

**Figure S18.**  $^{13}\text{C}$  NMR of compound **3g**.

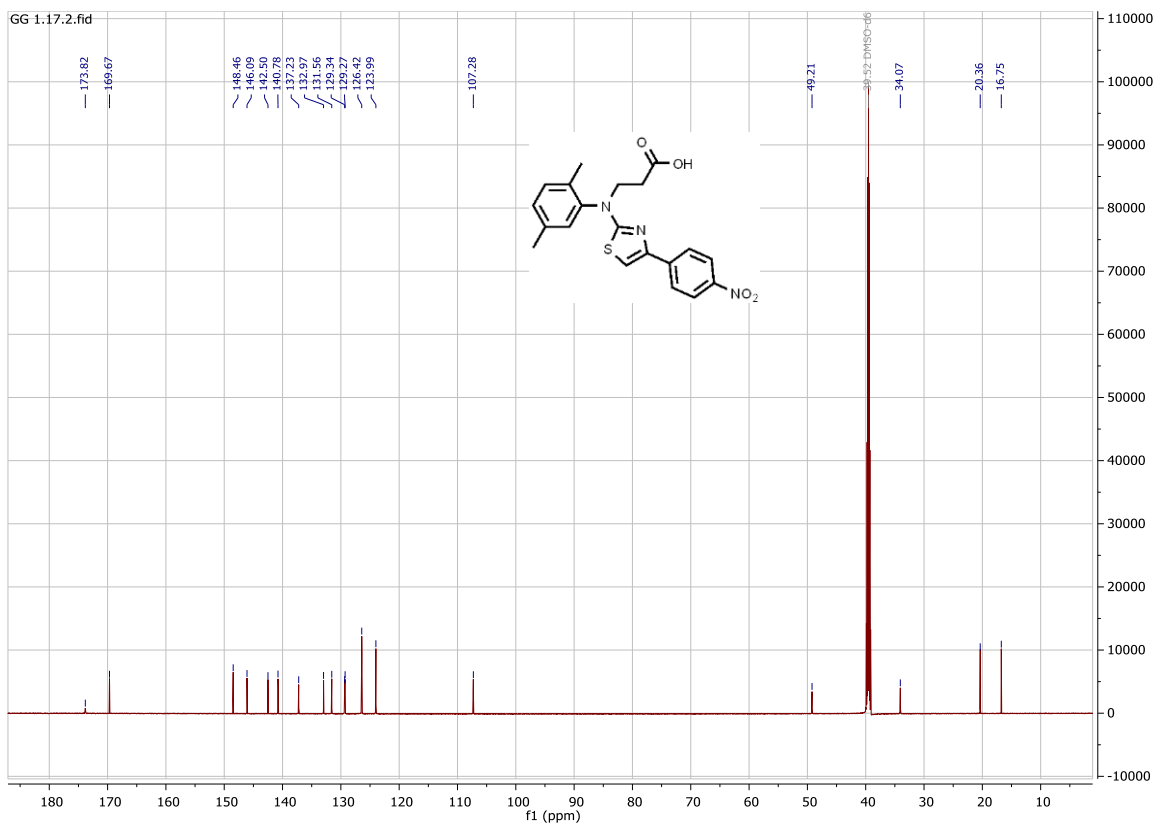

3-[[4-(3,4-Dichlorophenyl)-1,3-thiazol-2-yl](2,5-dimethylphenyl)amino]propanoic acid (**3h**)

**Figure S19.** <sup>1</sup>H NMR of compound **3h**. A peak at 3.53 ppm for water is observed in Figure S19, and identified by chemical shifts reported in the publication [1,2].

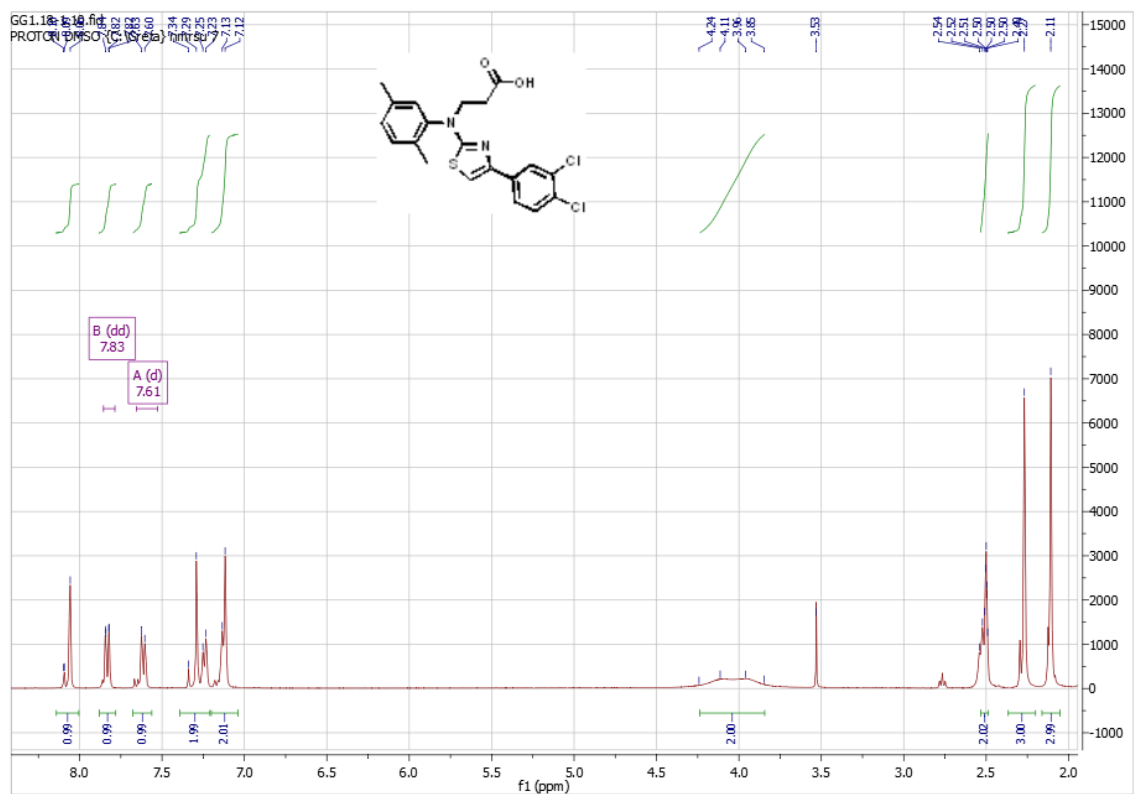

**Figure S20.** <sup>13</sup>C NMR of compound **3h**.

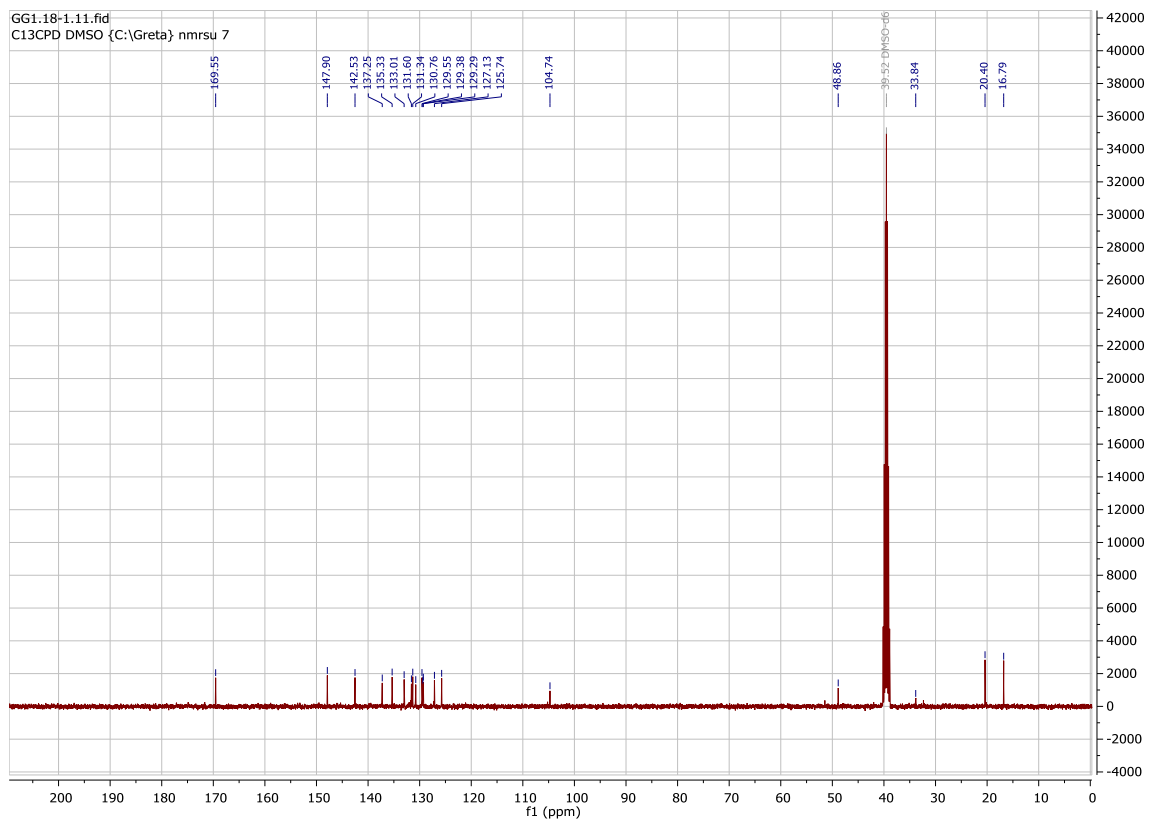

3-[[4-(4-Bromophenyl)-1,3-thiazol-2-yl](2,5-dimethylphenyl)amino]propanoic acid (**3i**)  
Figure S21. <sup>1</sup>H NMR of compound **3i**.

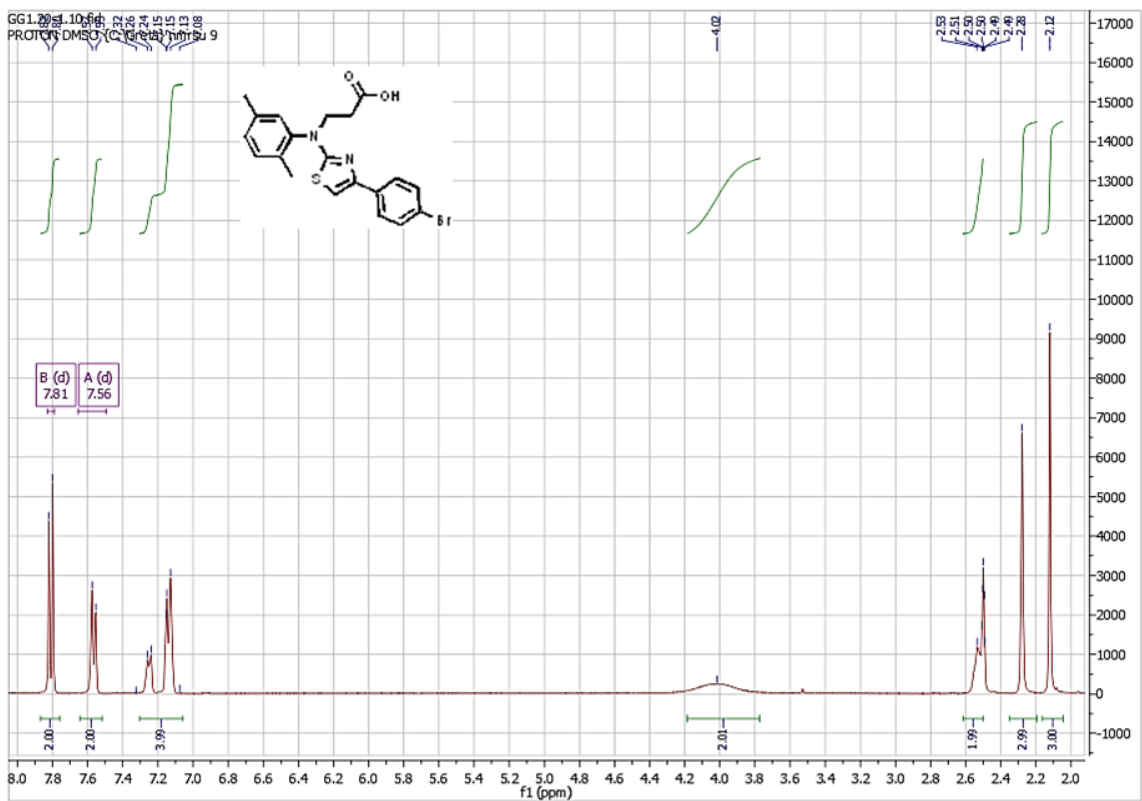

Figure S22. <sup>13</sup>C NMR of compound **3i**.

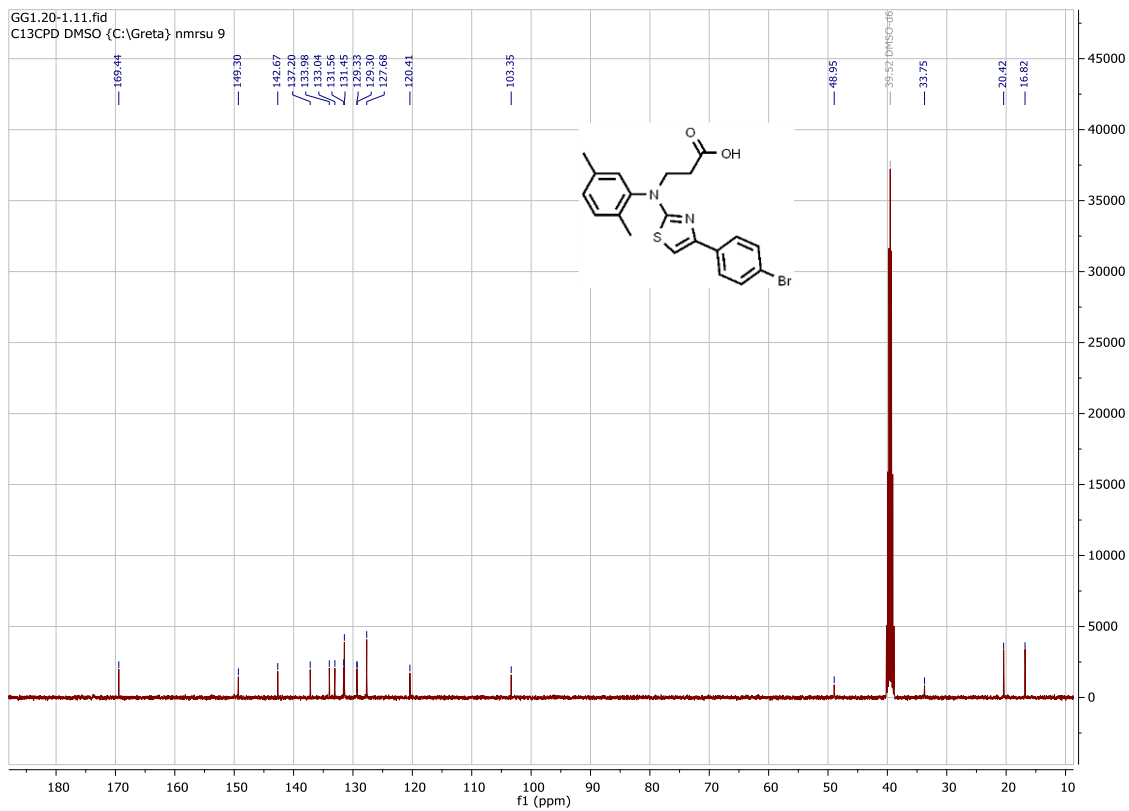

3-((2,5-Dimethylphenyl)[4-(naphthalen-2-yl)thiazol-2-yl]amino)propanoic acid (**3j**)  
Figure S23. <sup>1</sup>H NMR of compound **3j**.

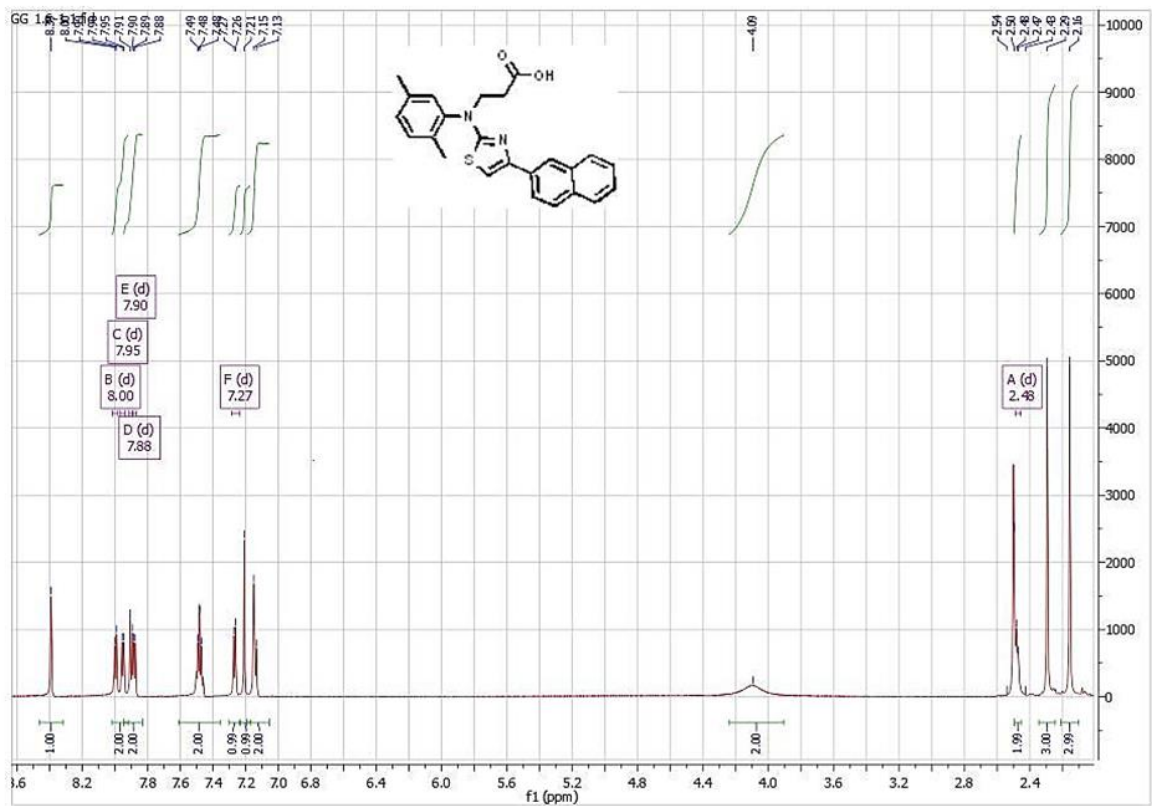

Figure S24. <sup>13</sup>C NMR of compound **3j**.

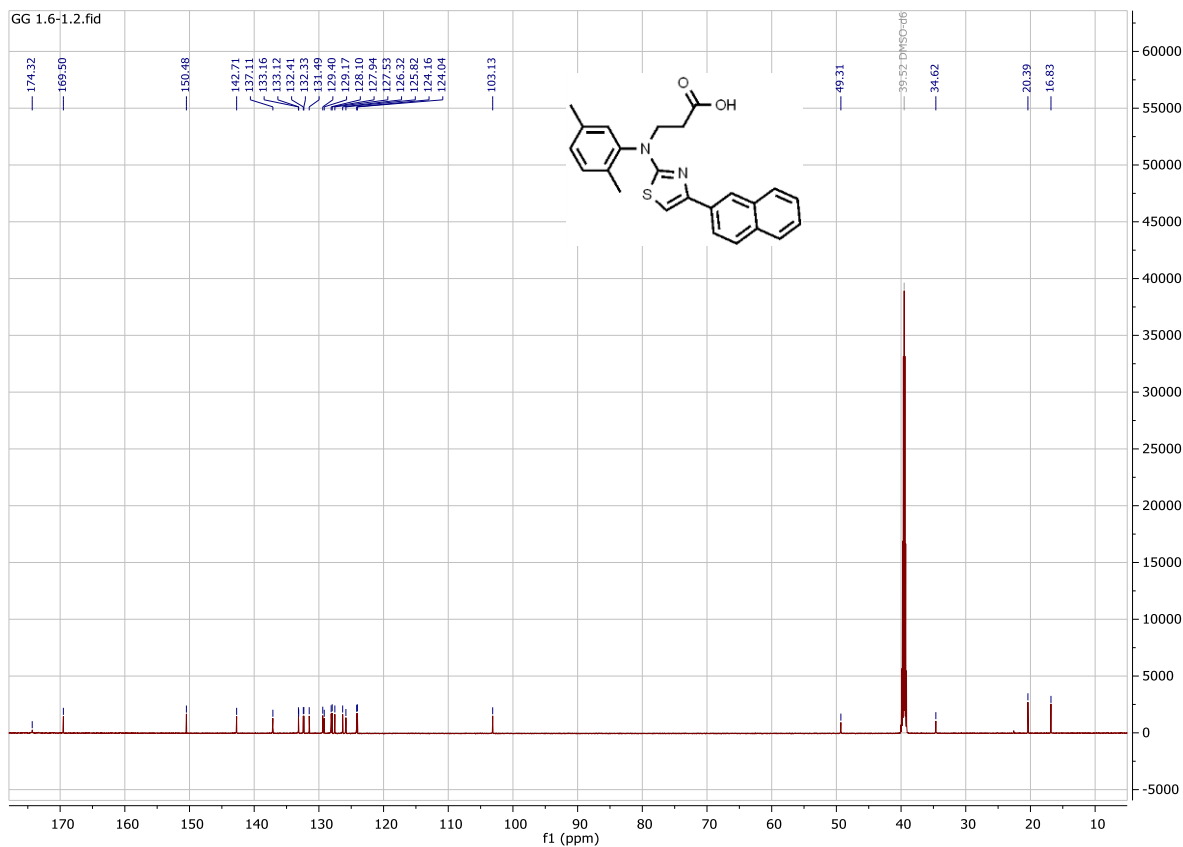

*3-{(2,5-Dimethylphenyl)[4-(2-oxo-2H-chromen-3-yl)thiazol-2-yl]amino}propanoic acid (3k)*

**Figure S25.**  $^1\text{H}$  NMR of compound **3k**.

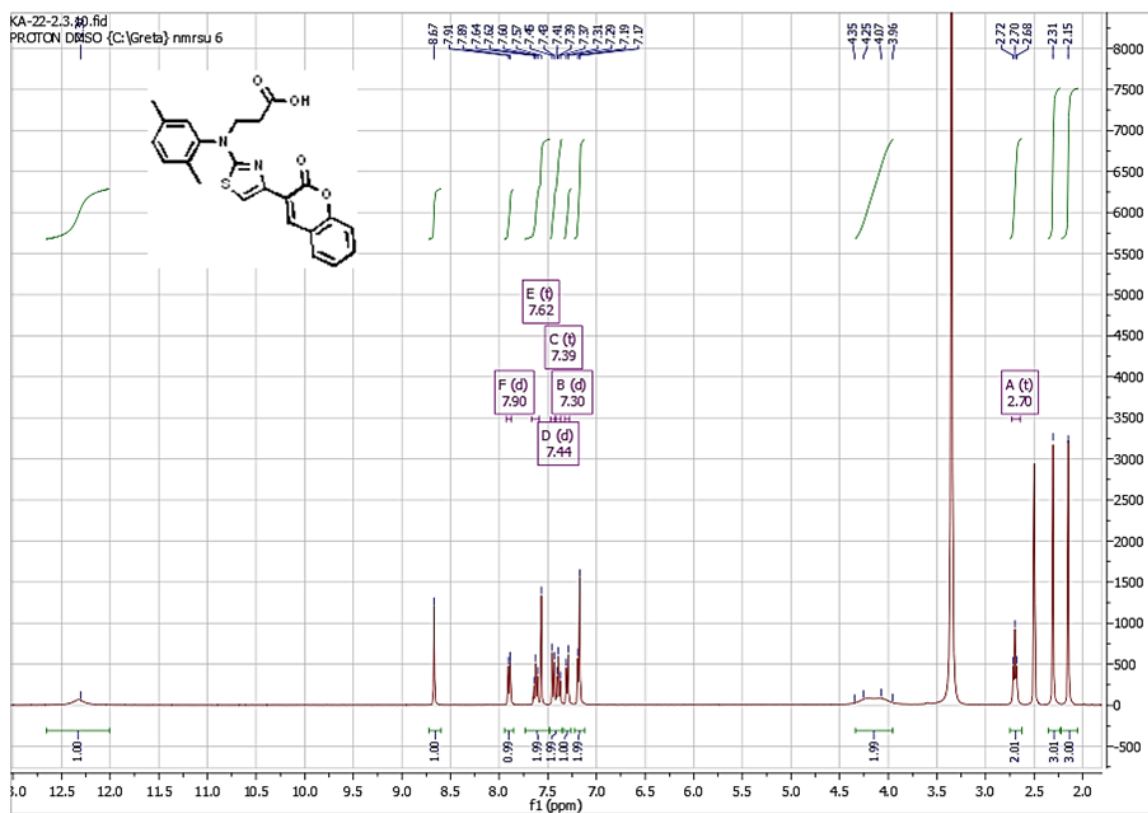

**Figure S26.**  $^{13}\text{C}$  NMR of compound **3k**.

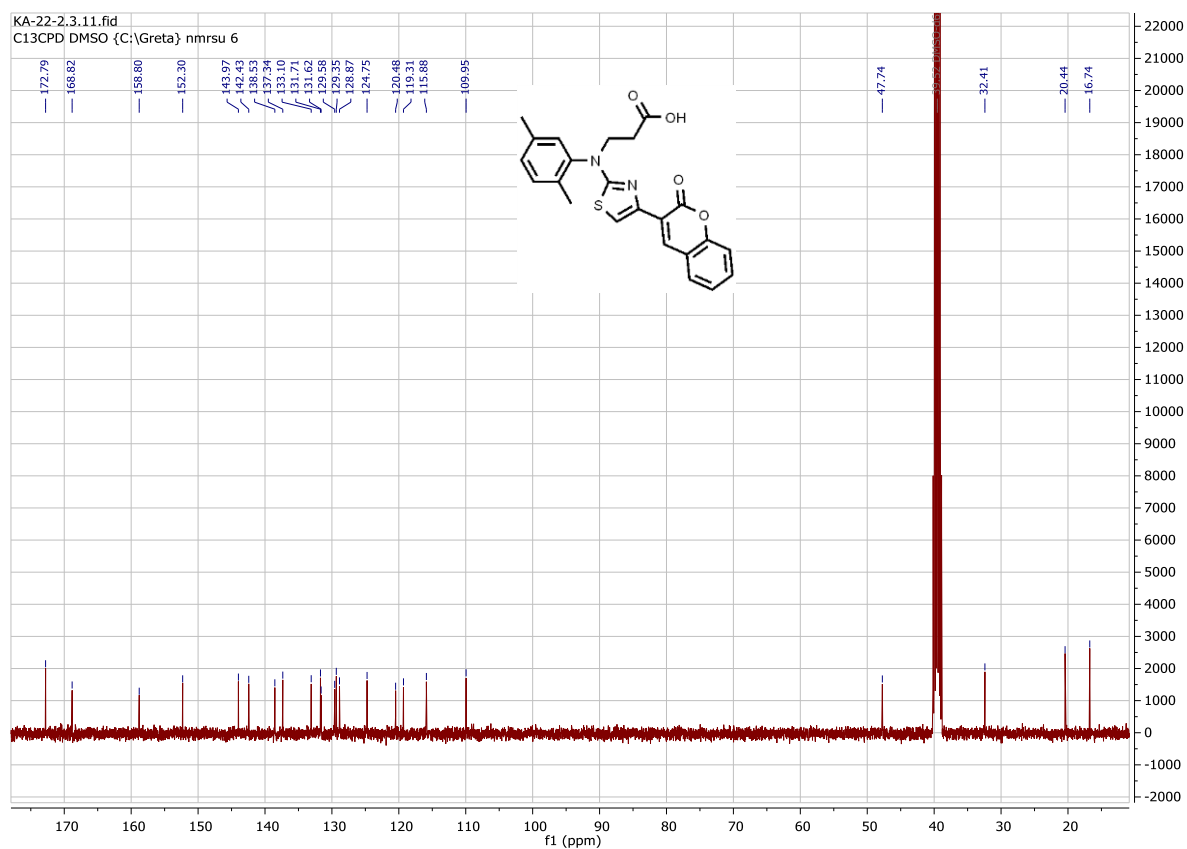

### General synthesis of compounds 4i-k

*1-[4-(4-Bromophenyl)-1,3-thiazol-2-yl]-5,8-dimethyl-2,3-dihydroquinolin-4(1H)-one (4i)*

**Figure S27.**  $^1\text{H}$  NMR of compound **4i**. A peak at 3.33 ppm for water is observed in Figure S27 and identified by chemical shifts reported in the publication [1,2].

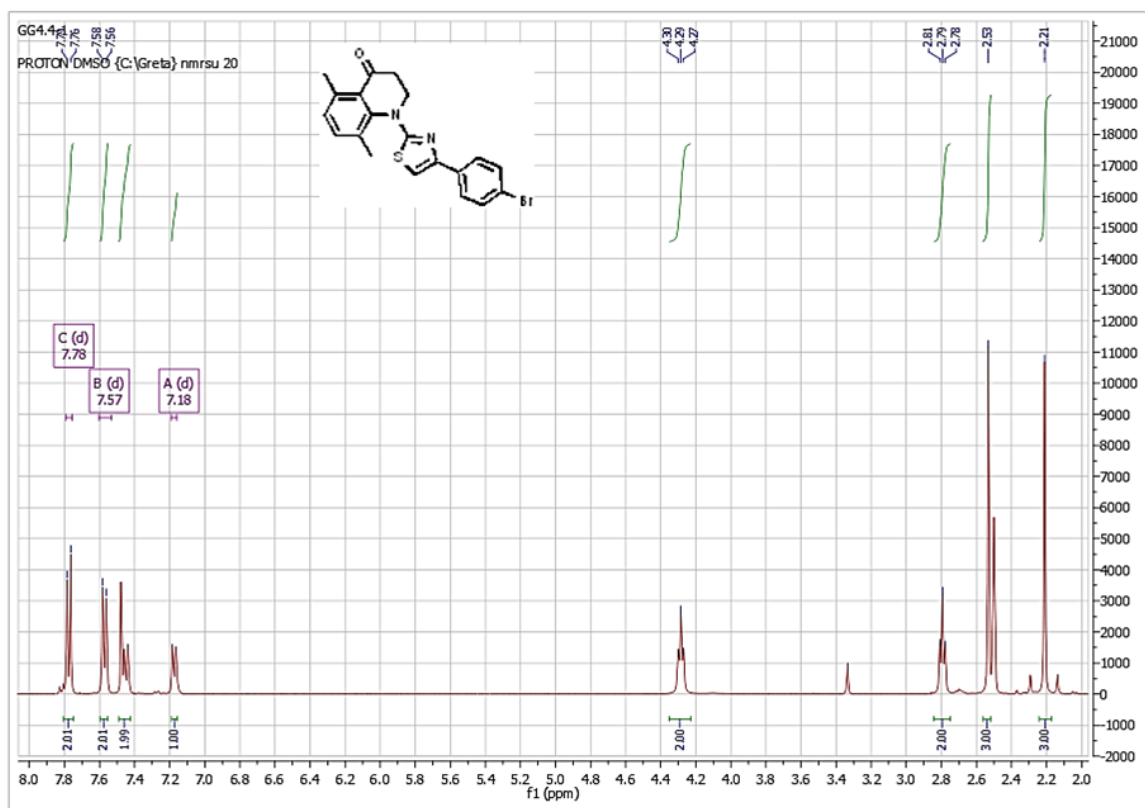

**Figure S28.**  $^{13}\text{C}$  NMR of compound **4i**.

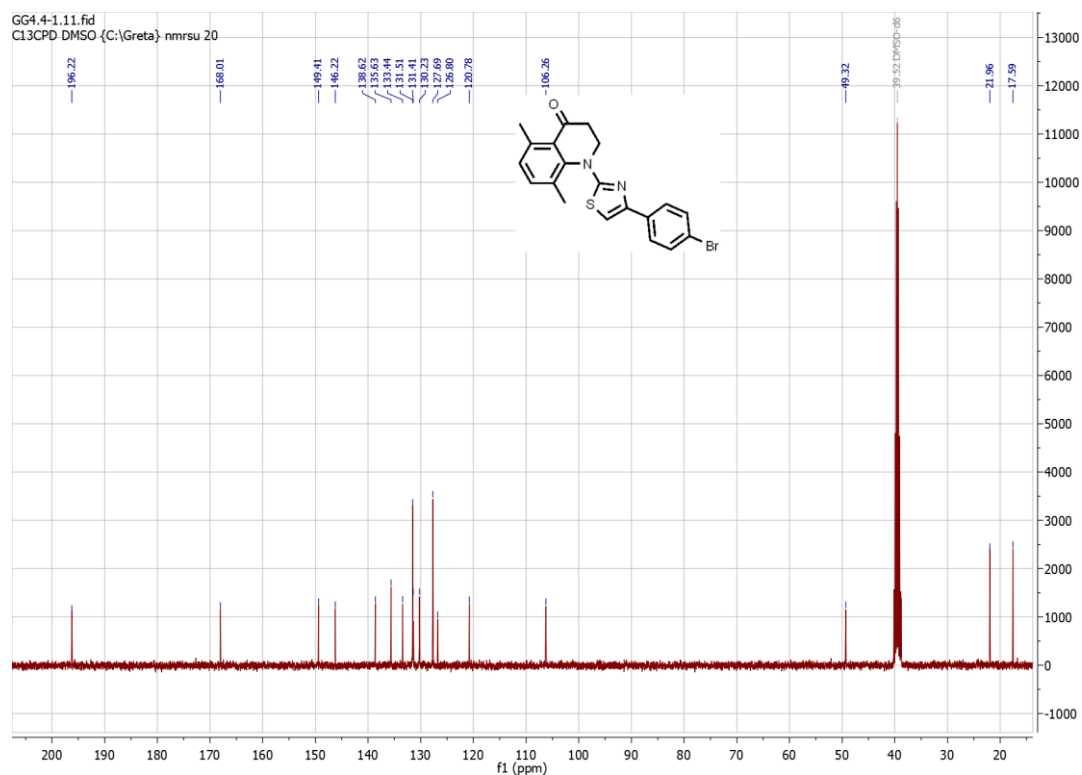

5,8-Dimethyl-1-[4-(naphthalen-2-yl)-1,3-thiazol-2-yl]-2,3-dihydroquinolin-4(1H)-one (**4j**)

**Figure S29.**  $^1\text{H}$  NMR of compound **4j**

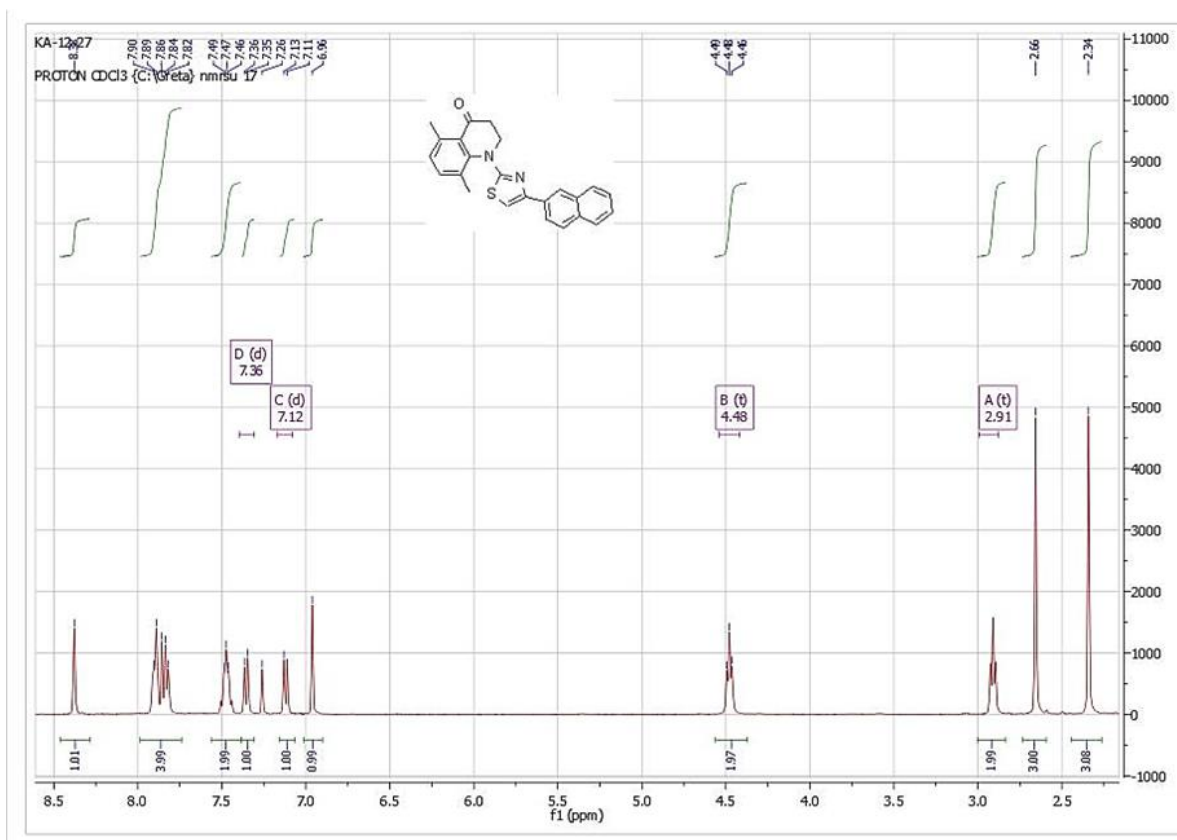

**Figure S30.**  $^{13}\text{C}$  NMR of compound **4j**.

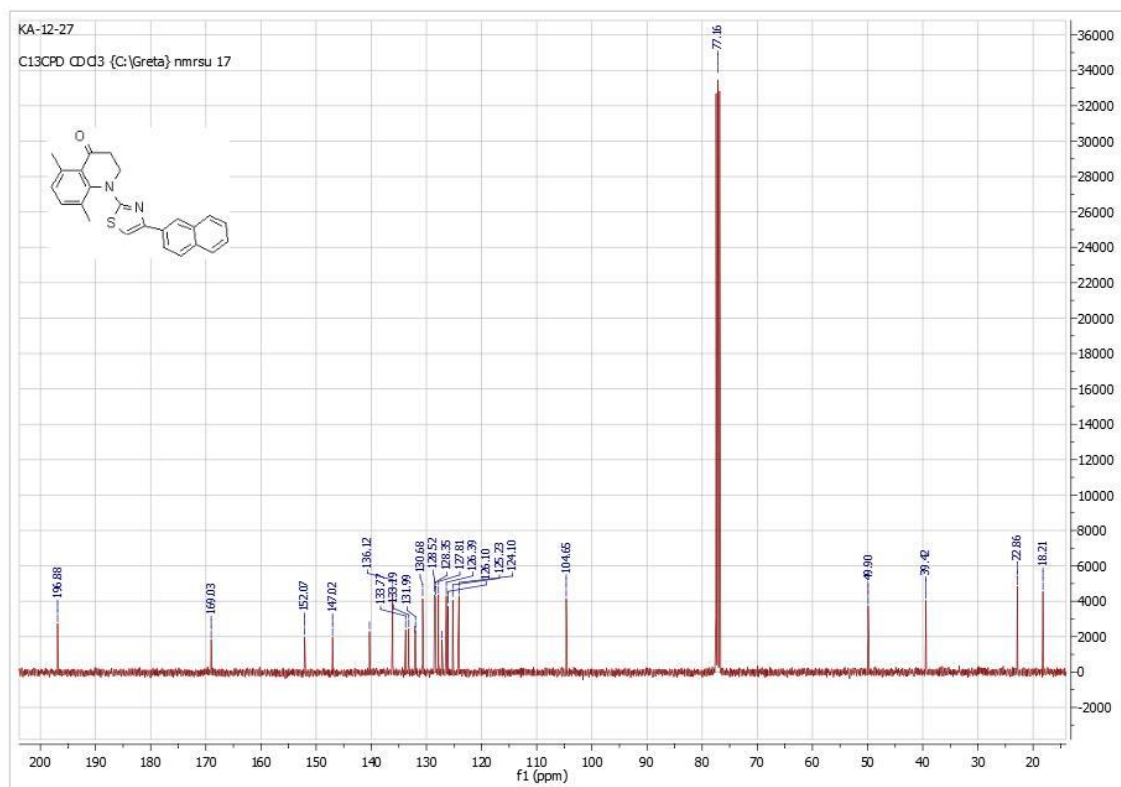

5,8-Dimethyl-1-[4-(2-oxo-2H-1-benzopyran-3-yl)-1,3-thiazol-2-yl]-2,3-dihydroquinolin-4(1H)-one (4k)

**Figure S31.** <sup>1</sup>H NMR of compound 4k. A broad peak at 3.33 ppm for water is observed in Figure S31 and identified by chemical shifts reported in the publication [1,2].

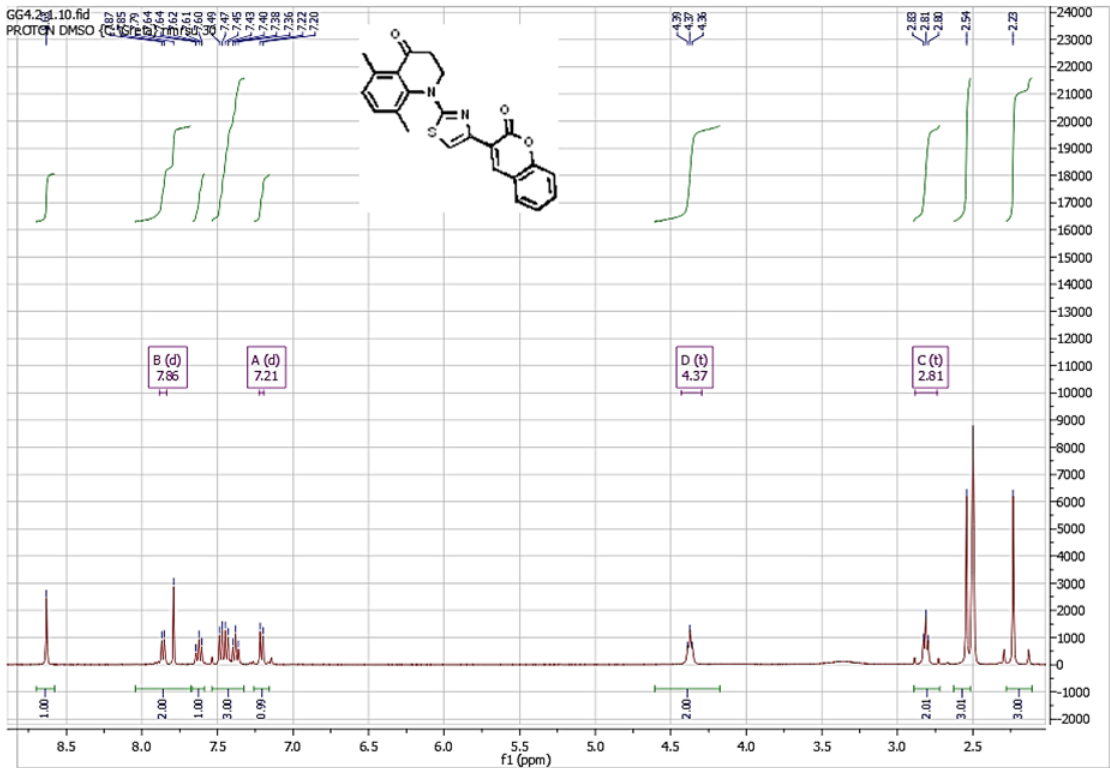

**Figure S32.** <sup>13</sup>C NMR of compound 4k.

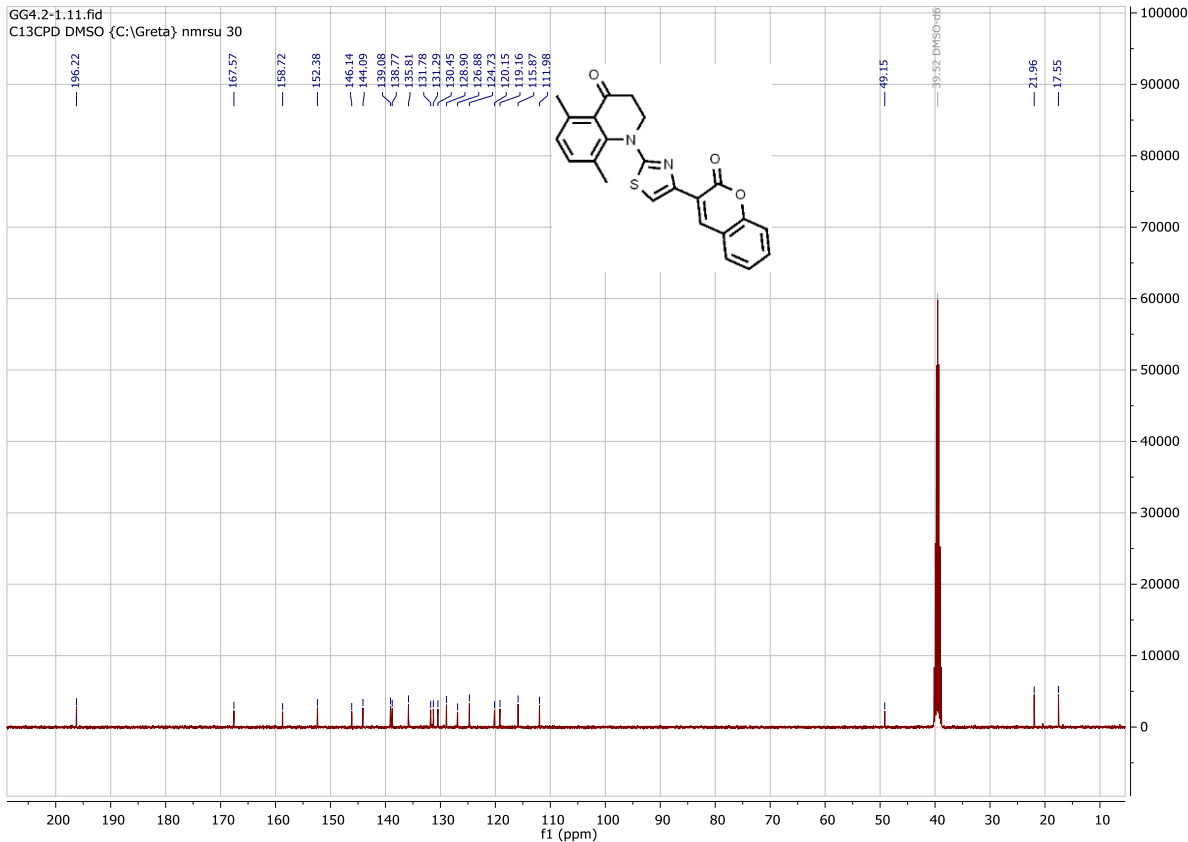

3-[(5-Acetyl-4-methyl-1,3-thiazol-2-yl)(2,5-dimethylphenyl)amino]propanoic acid (**5**)  
Figure S33. <sup>1</sup>H NMR of compound **5**.

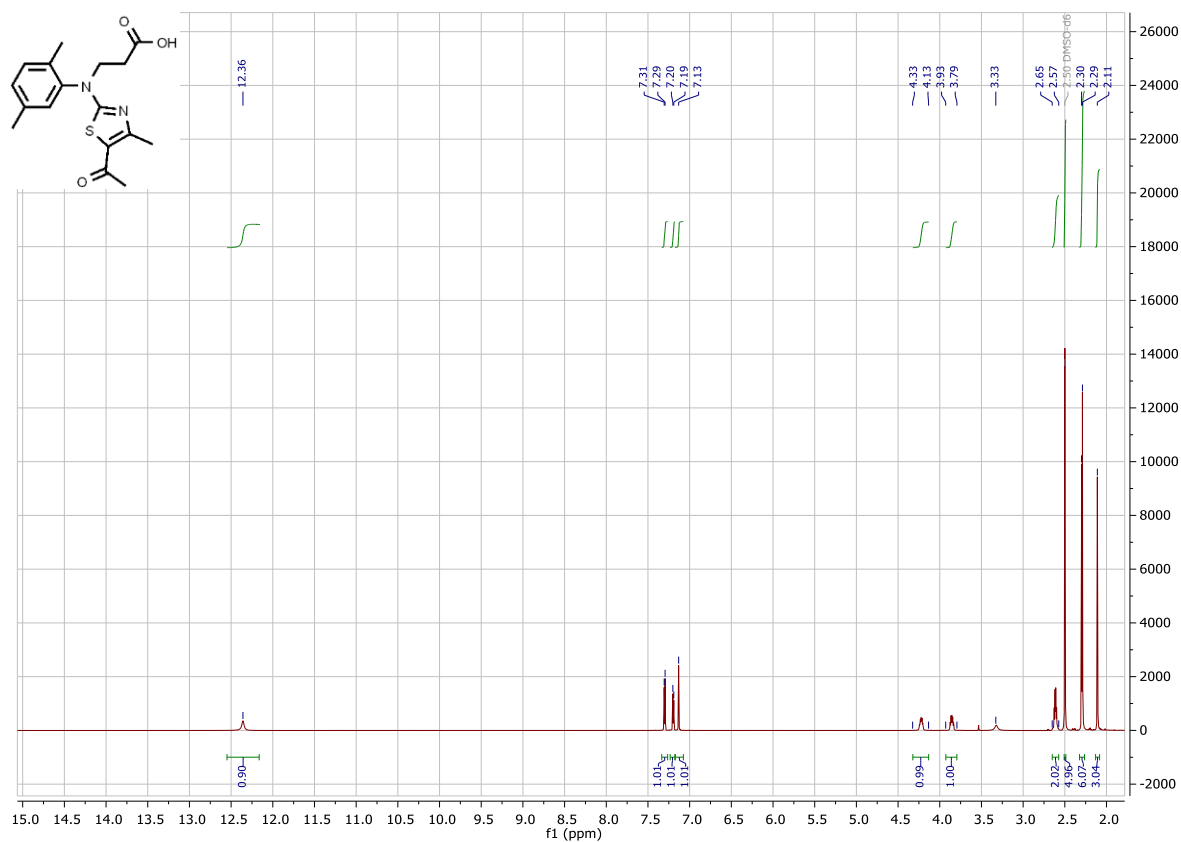

Figure S34. <sup>13</sup>C NMR of compound **5**.

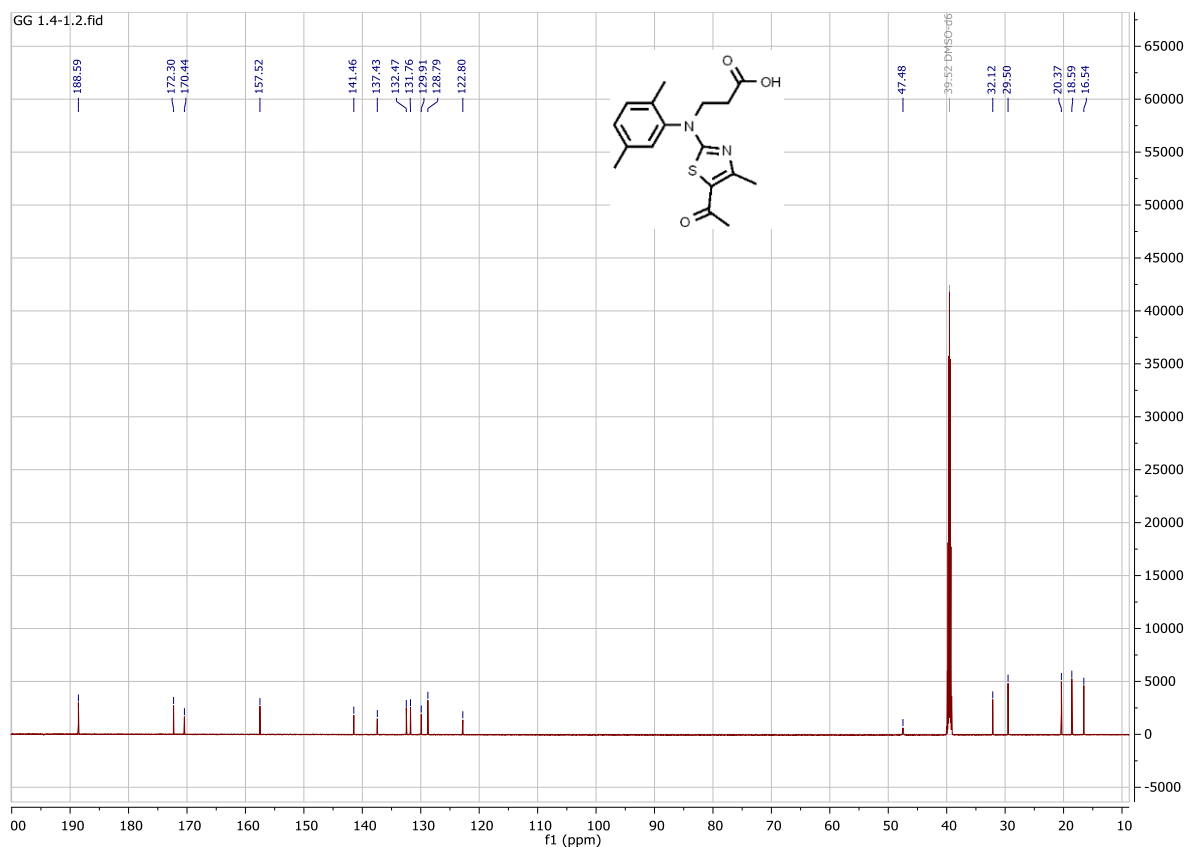

3-[(2,5-Dimethylphenyl)([1,3]thiazolo[4,5-b]quinoxalin-2-yl)amino]propanoic acid (**6**)

**Figure S35.** <sup>1</sup>H NMR of compound **6**. A broad peak at 3.33 ppm for water is observed in Figure S35 and identified by chemical shifts reported in the publication [1,2].

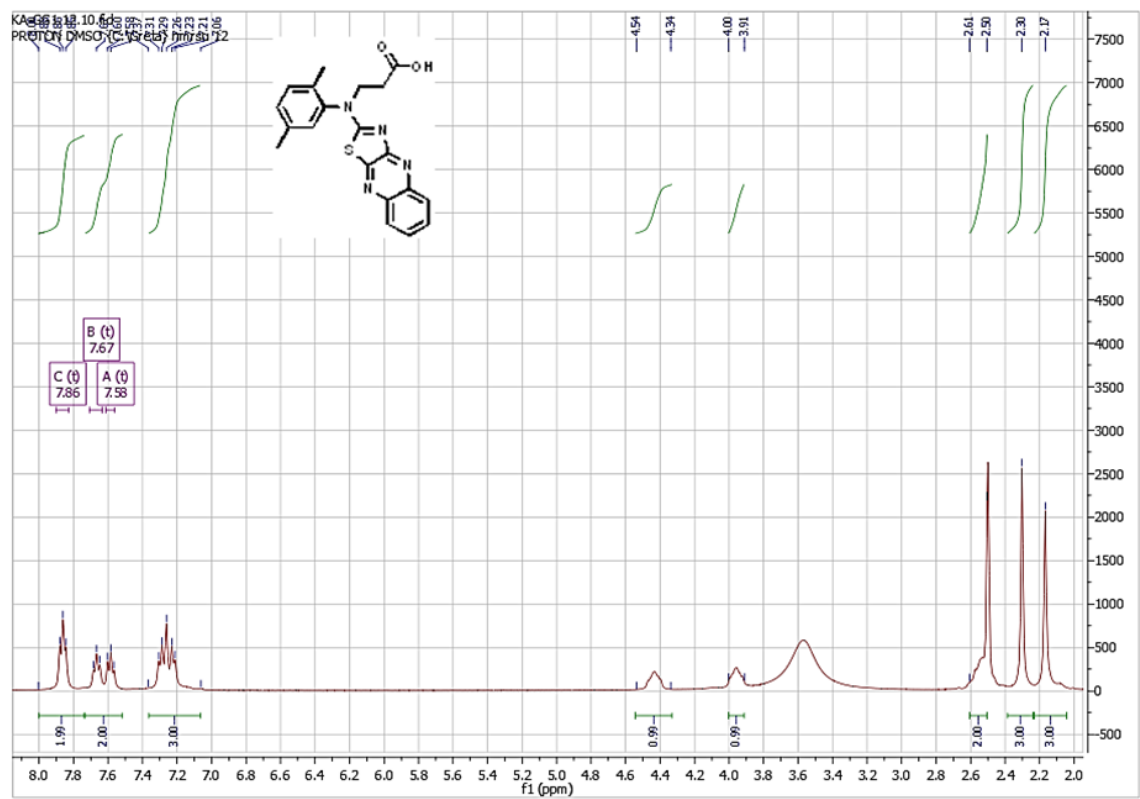

**Figure S36.** <sup>13</sup>C NMR of compound **6**.

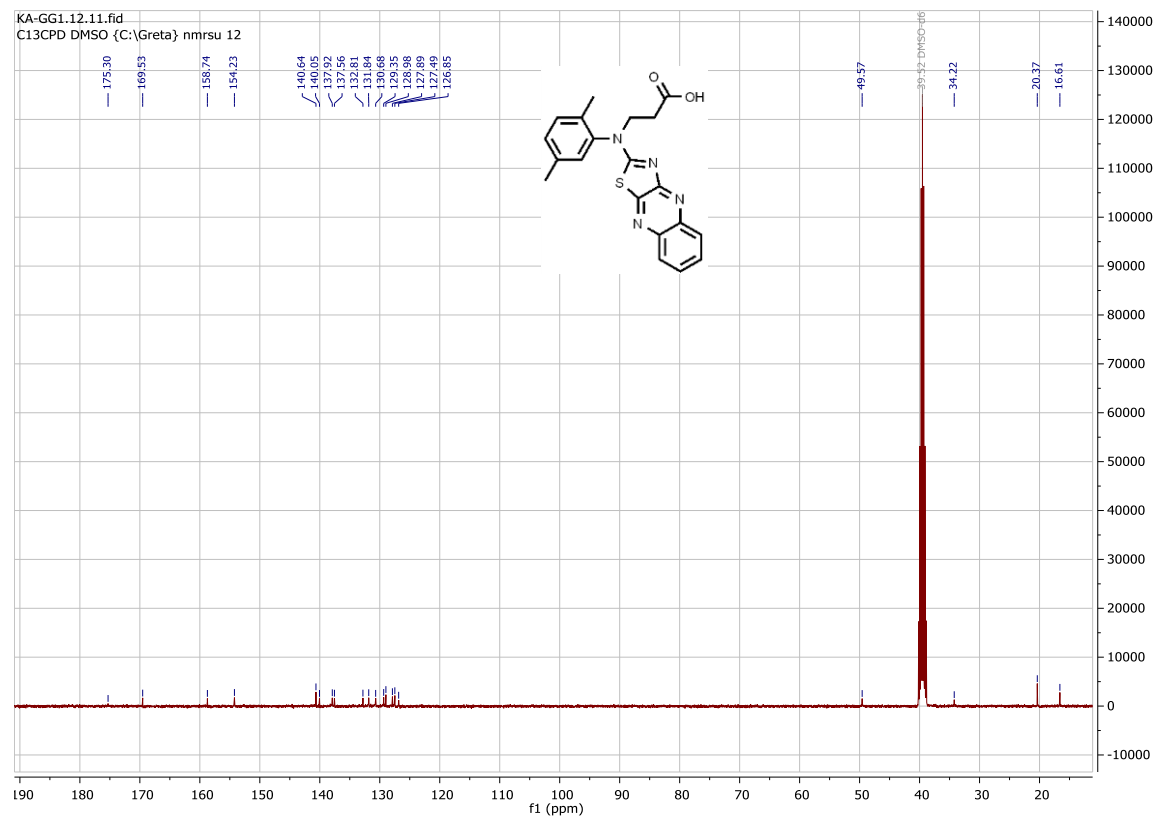

3-[(2,5-Dimethylphenyl)(4,9-dioxo-4,9-dihydronaphtho[2,3-d][1,3]thiazol-2-yl)amino]propanoic acid (**7**)  
**Figure S37.**  $^1\text{H}$  NMR of compound **7**.

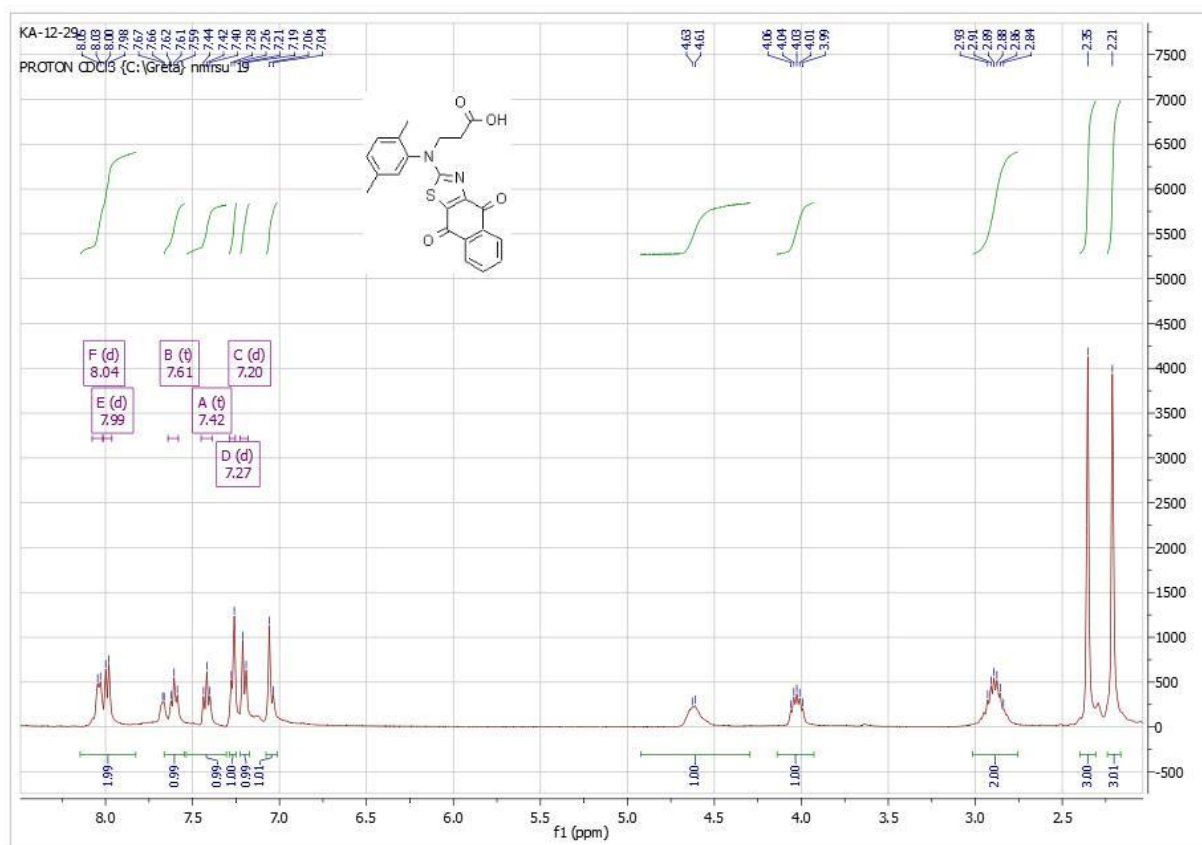

**Figure S38.**  $^{13}\text{C}$  NMR of compound **7**.

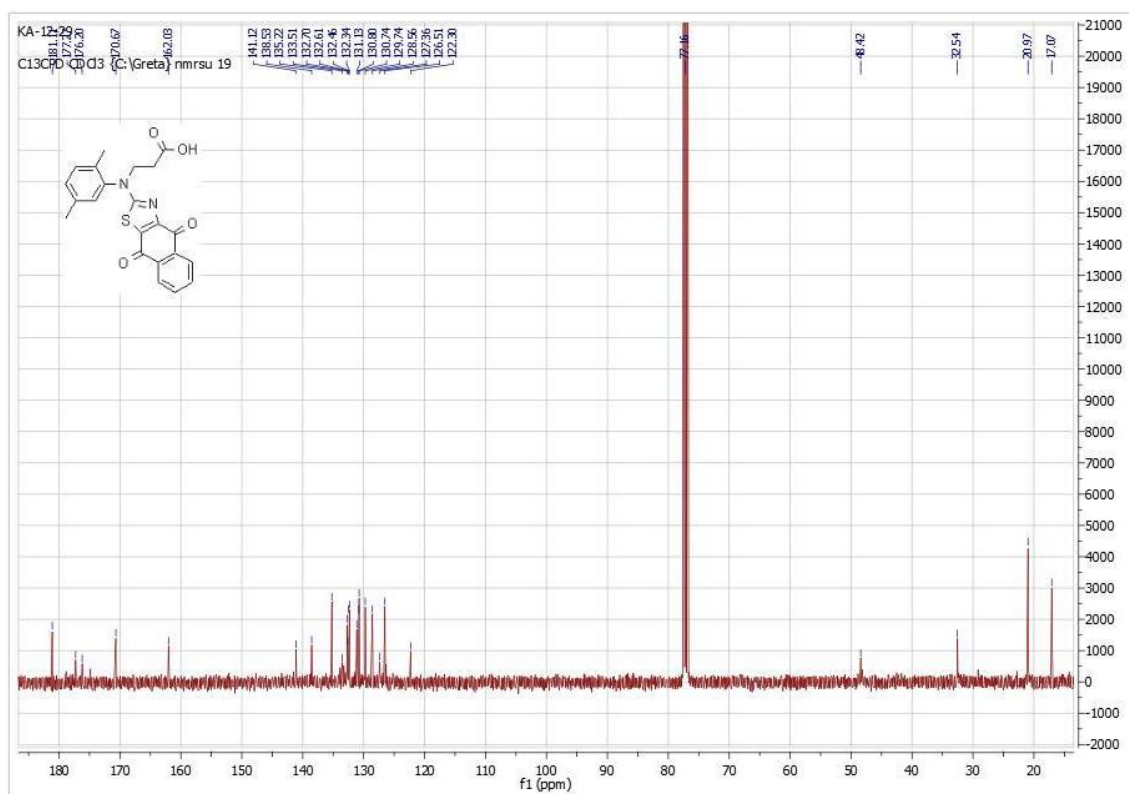

Methyl 3-[[4-(4-chlorophenyl)-1,3-thiazol-2-yl](2,5-dimethylphenyl)amino]propanoate (**8f**)

**Figure S39.** <sup>1</sup>H NMR of compound **8f**. A peak at 3.33 ppm for water is observed in Figure S5 and identified by chemical shifts reported in the publication [1,2].

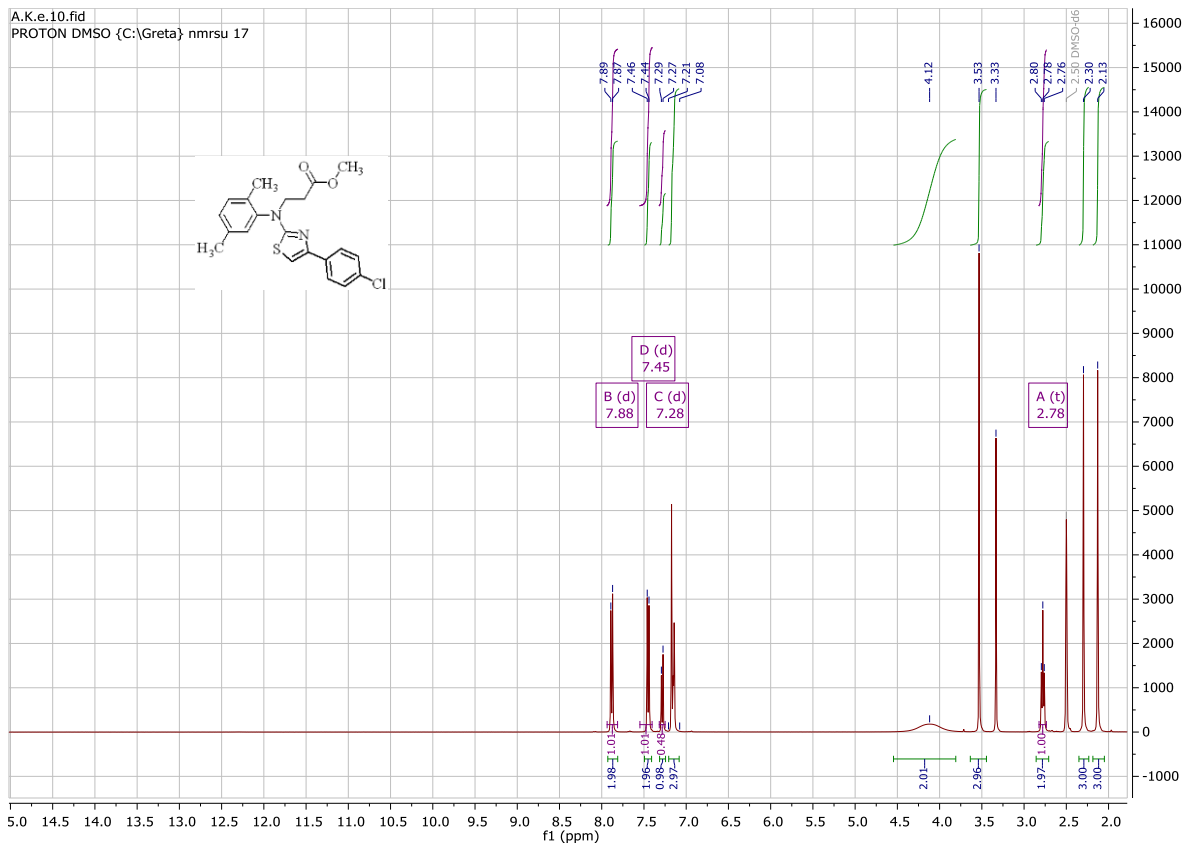

**Figure S40.** <sup>13</sup>C NMR of compound **8f**.

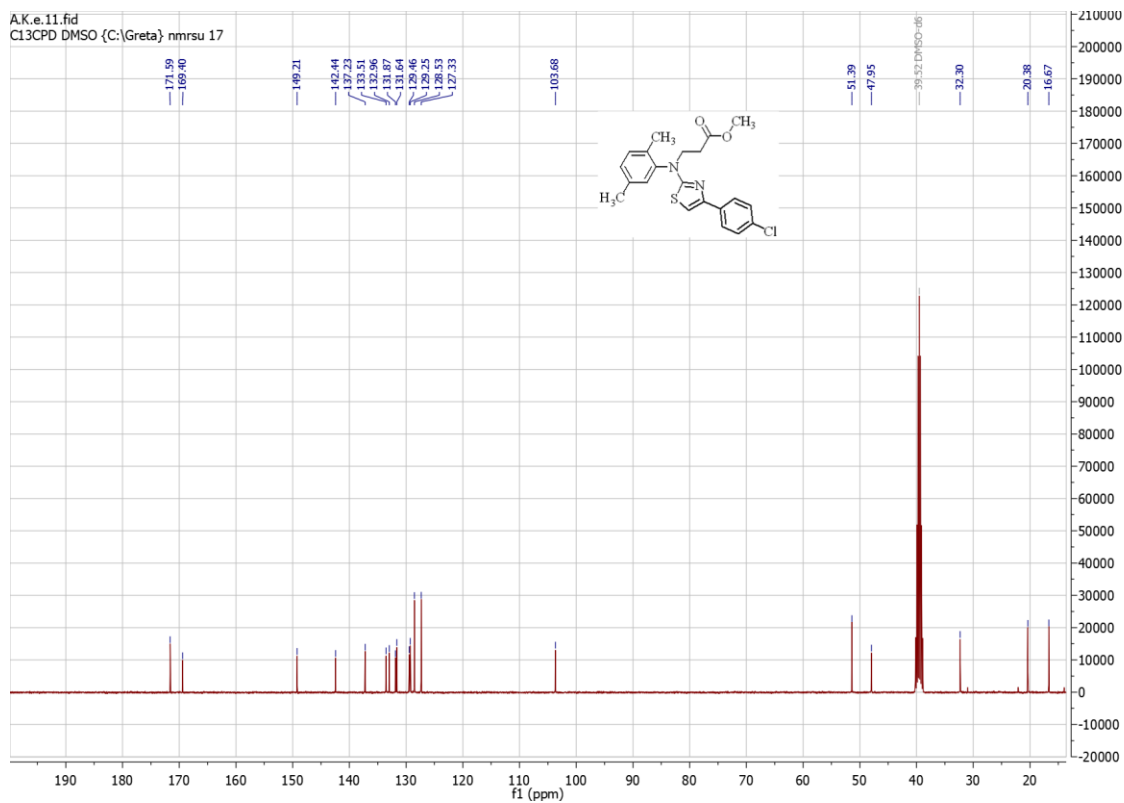

3-[[4-(4-Chlorophenyl)-1,3-thiazol-2-yl](2,5-dimethylphenyl)amino]propanehydrazide (**9f**)

**Figure S41.**  $^1\text{H}$  NMR of compound **9f**. A peak at 3.33 ppm for water is observed in Figure S41 and identified by chemical shifts reported in the publication [1,2].

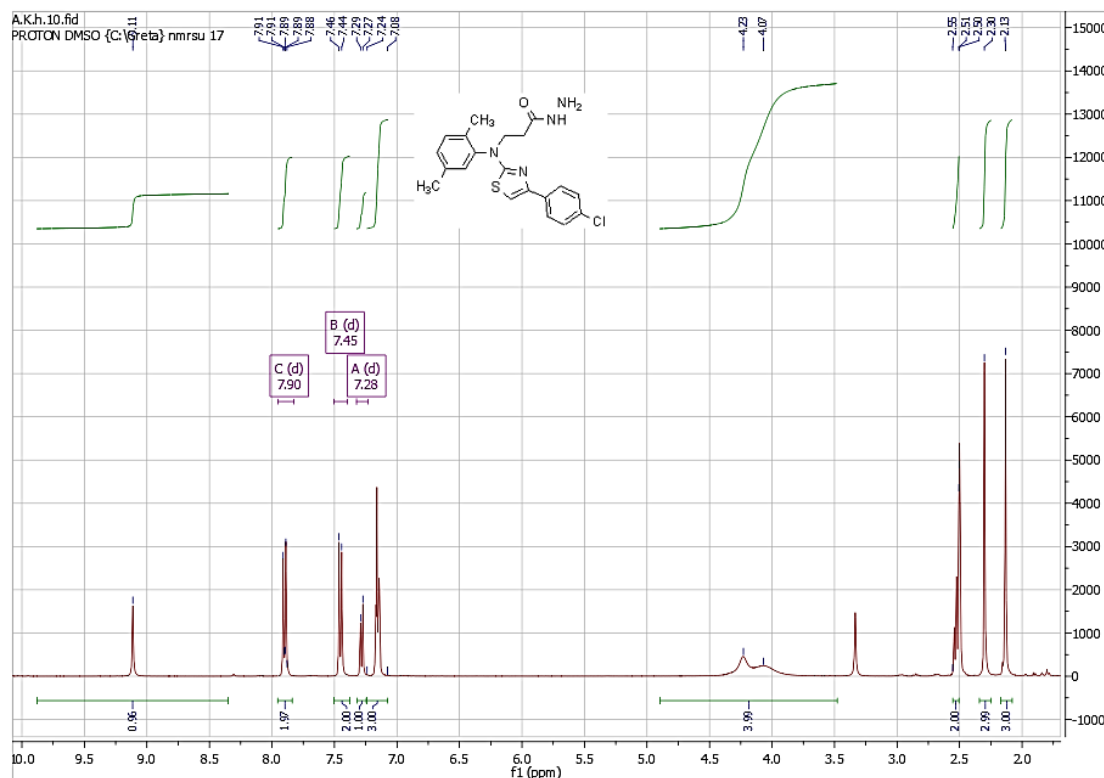

**Figure S42.**  $^{13}\text{C}$  NMR of compound **9f**.

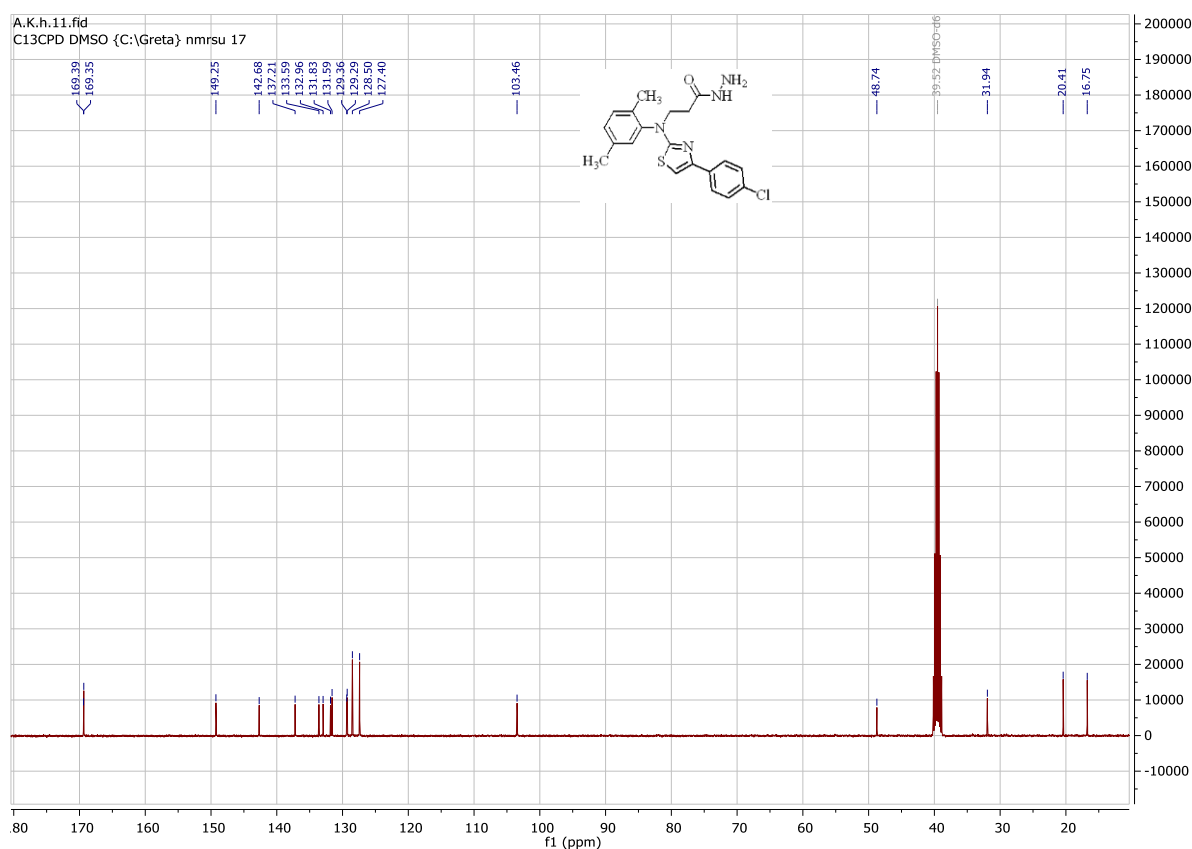

General synthesis of compounds 10–12f

(Z/E)-3-[[4-(4-Chlorophenyl)thiazol-2-yl](2,5-dimethylphenyl)amino]-N'-[(5-nitrothiophen-2-yl)methylene]propanehydrazide (**10f**)

**Figure S43.** <sup>1</sup>H NMR of compound **10f**. The peaks for 1,4-dioxane at 3.53 ppm in figure S43 and 66.35 ppm in figure S44 is noticed and identified by reference to chemical shifts described in the publication [1].

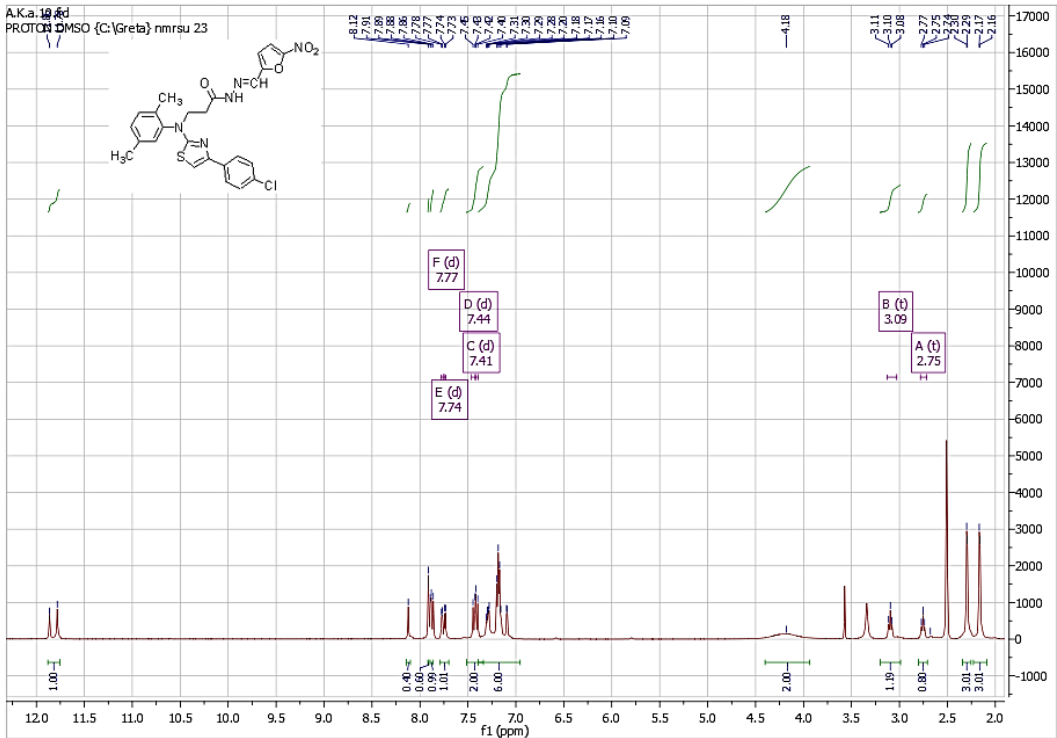

**Figure S44.** <sup>13</sup>C NMR of compound **10f**.

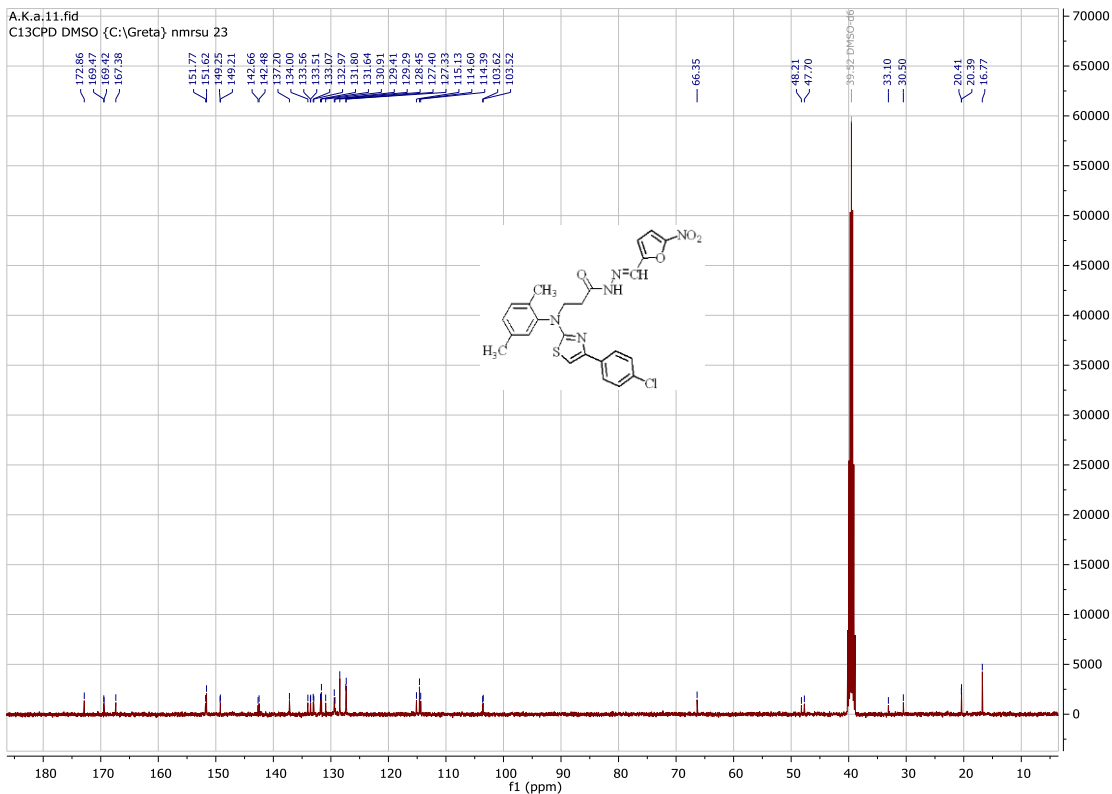

(Z/E)-3-((4-(4-Chlorophenyl)thiazol-2-yl)(2,5-dimethylphenyl)amino)-N'-((5-nitrofuran-2-yl)methylene)propanehydrazide (**11f**)

**Figure S45.** <sup>1</sup>H NMR of compound **11f**. A broad peak at 3.33 ppm for water is observed in Figure S45 and identified by chemical shifts reported in the publication [1,2].

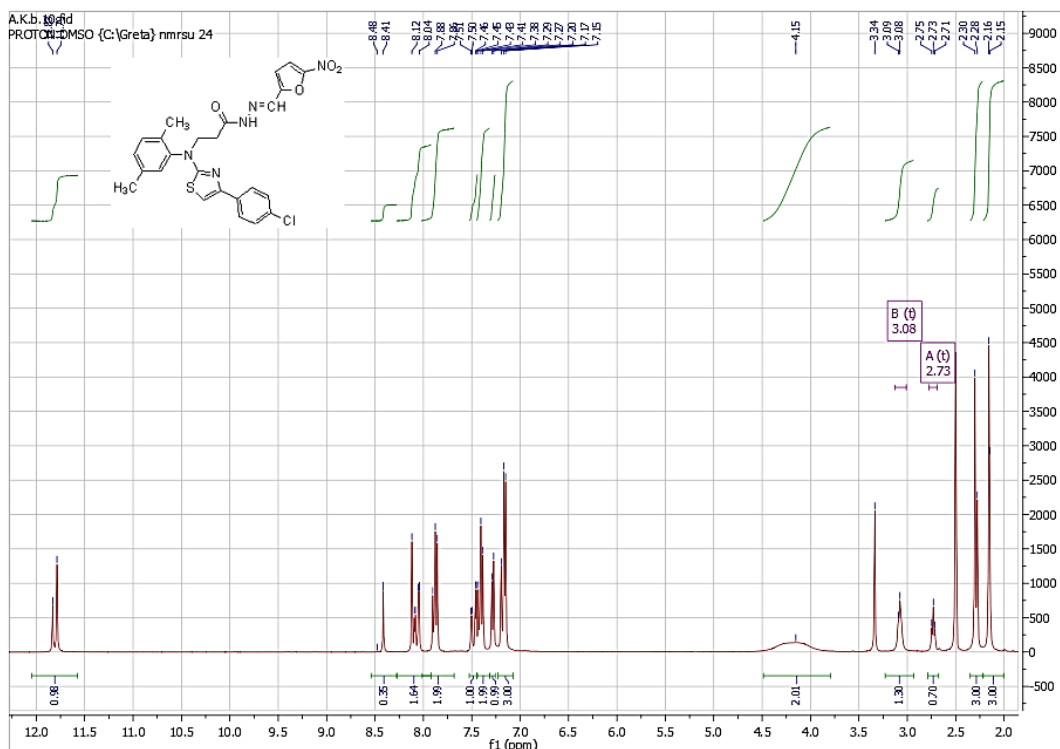

**Figure S46.** <sup>13</sup>C NMR of compound **11f**.

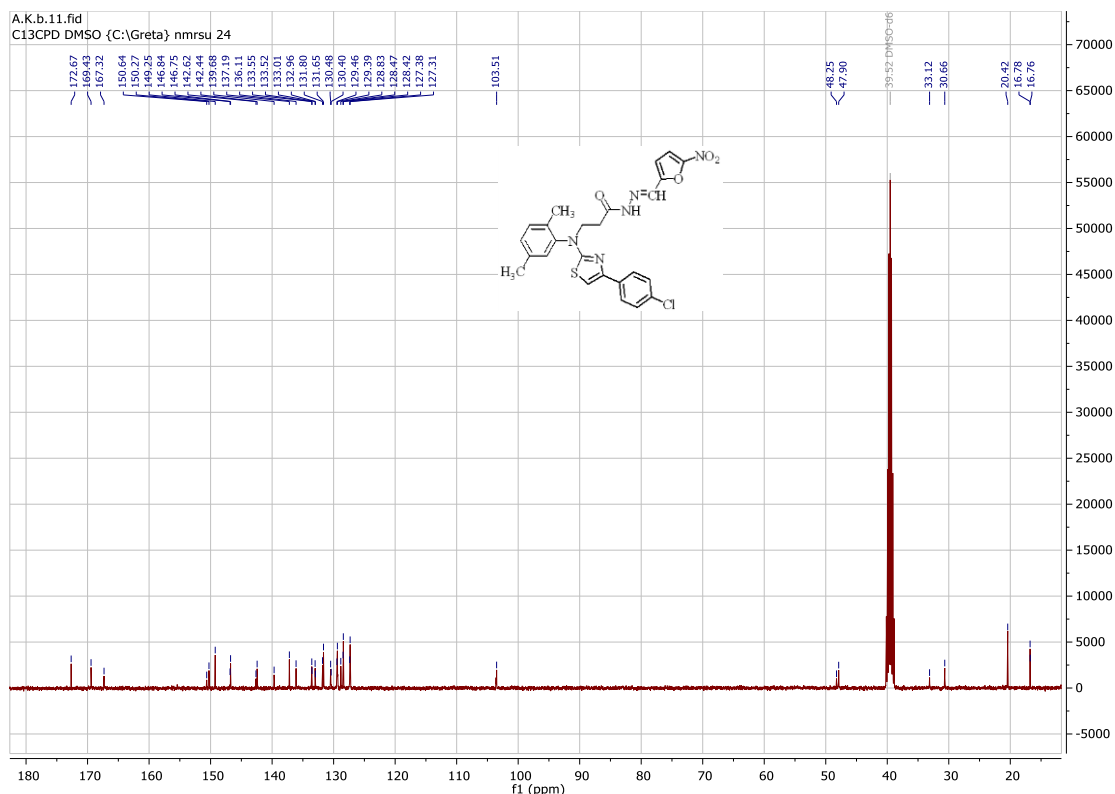

(Z/E)-N'-((1H-Indol-3-yl)methylene)-3-((4-(4-chlorophenyl)thiazol-2-yl)(2,5-dimethylphenyl)amino)propanehydrazide (**12f**)  
**Figure S47.** <sup>1</sup>H NMR of compound **12f**. A broad peak at 3.33 ppm for water is observed in Figure S47 and identified by chemical shifts reported in the publication [1,2].

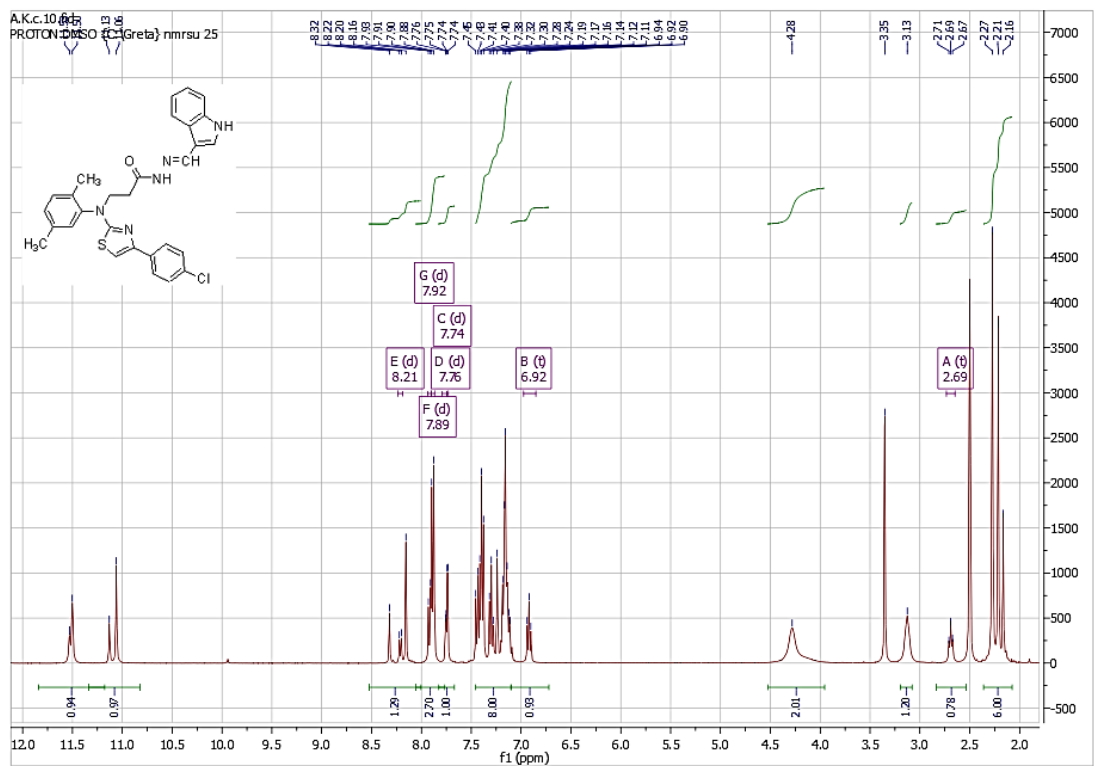

**Figure S48.** <sup>13</sup>C NMR of compound **12f**.

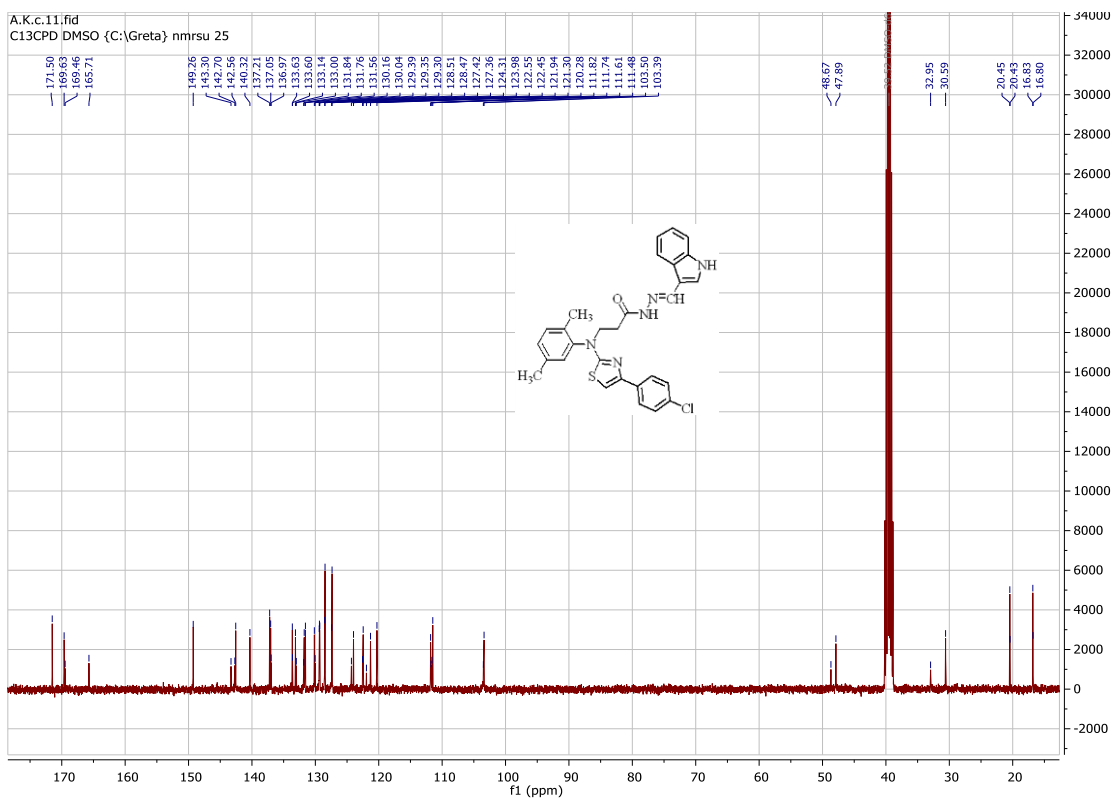

3- $\{[4-(4\text{-Chlorophenyl})\text{thiazol-2-yl}](2,5\text{-dimethylphenyl})\text{amino}\}$ - $N'$ -cyclopentylidenepropanehydrazide (**13f**)

**Figure S49.**  $^1\text{H}$  NMR of compound **13f**. A broad peak at 3.33 ppm for water is observed in Figure S49 and identified by chemical shifts reported in the publication [1,2]. The peaks for 1,4-dioxane at 3.53 ppm in figure S49 and 66.35 ppm in figure S50 is noticed and identified by reference to chemical shifts described in the publication [1].

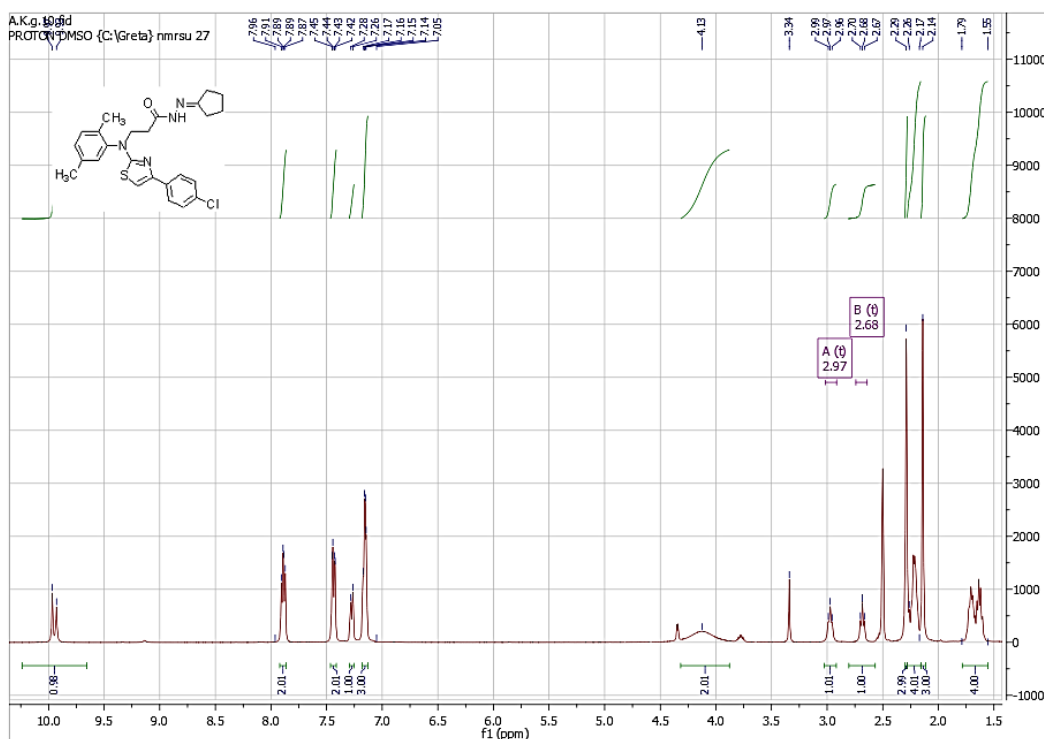

**Figure S50.**  $^{13}\text{C}$  NMR of compound **13f**.

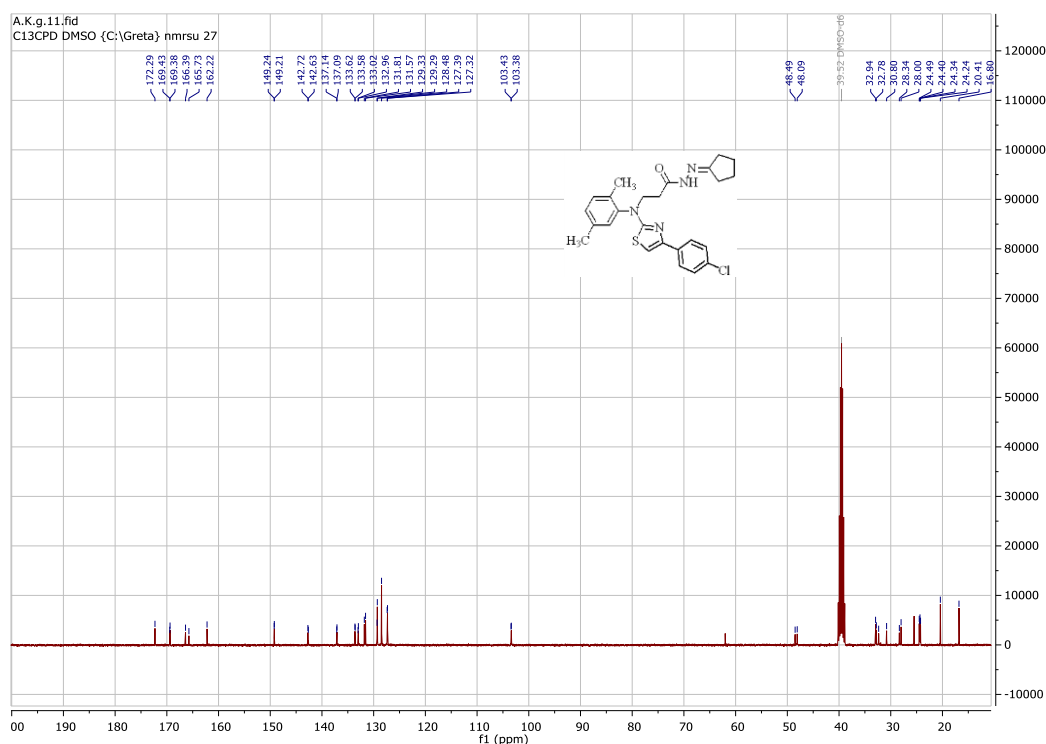

### General synthesis of compounds **14f** and **15f**

(*Z/E*)-*N'*-(Butan-2-ylidene)-3-[[4-(4-chlorophenyl)thiazol-2-yl](2,5-dimethylphenyl)amino]propanehydrazide (**14f**)

**Figure S51.**  $^1\text{H}$  NMR of compound **14f**. A broad peak for water at 3.33 ppm is observed in Figure S51 and identified by chemical shifts reported in the publication [1,2]. The peaks for 1,4-dioxane at 3.53 ppm in figure S51 and 66.35 ppm in figure S52 is noticed and identified by reference to chemical shifts described in the publication [1].

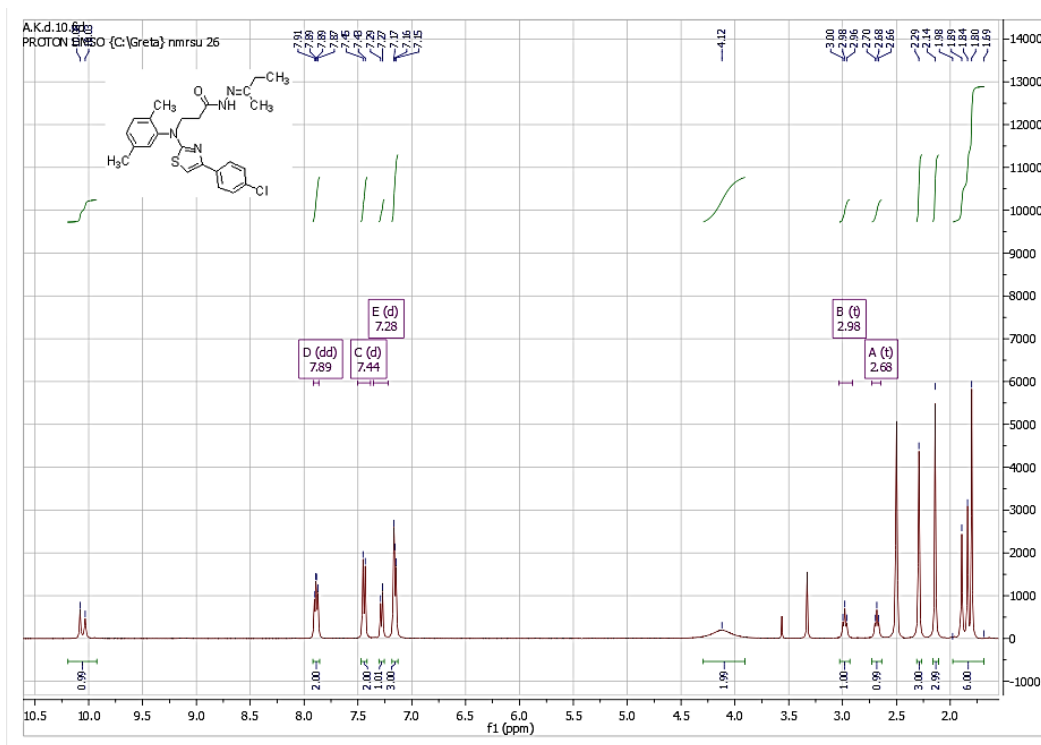

**Figure S52.**  $^{13}\text{C}$  NMR of compound **14f**.

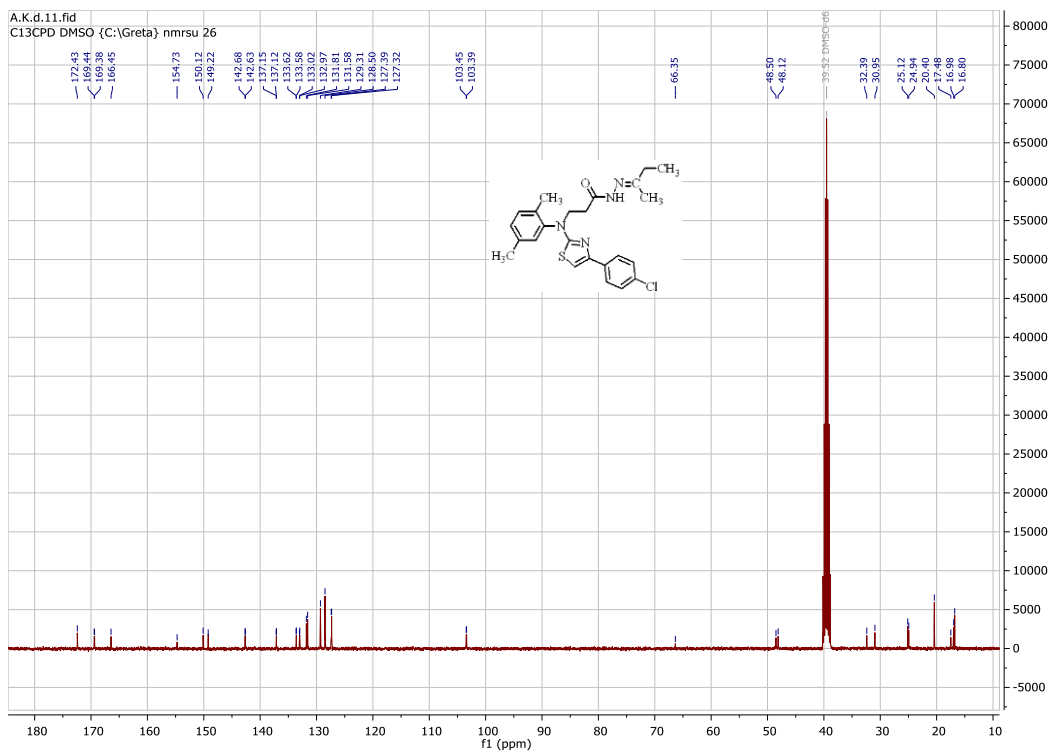

(Z/E)-3-[[4-(4-Chlorophenyl)thiazol-2-yl](2,5-dimethylphenyl)amino]-N'-(octan-2-ylidene)propanehydrazide (**15f**)  
**Figure S53.** <sup>1</sup>H NMR of compound **15f**. A broad peak at 3.33 ppm for water is observed in Figure S53 and identified by chemical shifts reported in the publication [1,2].

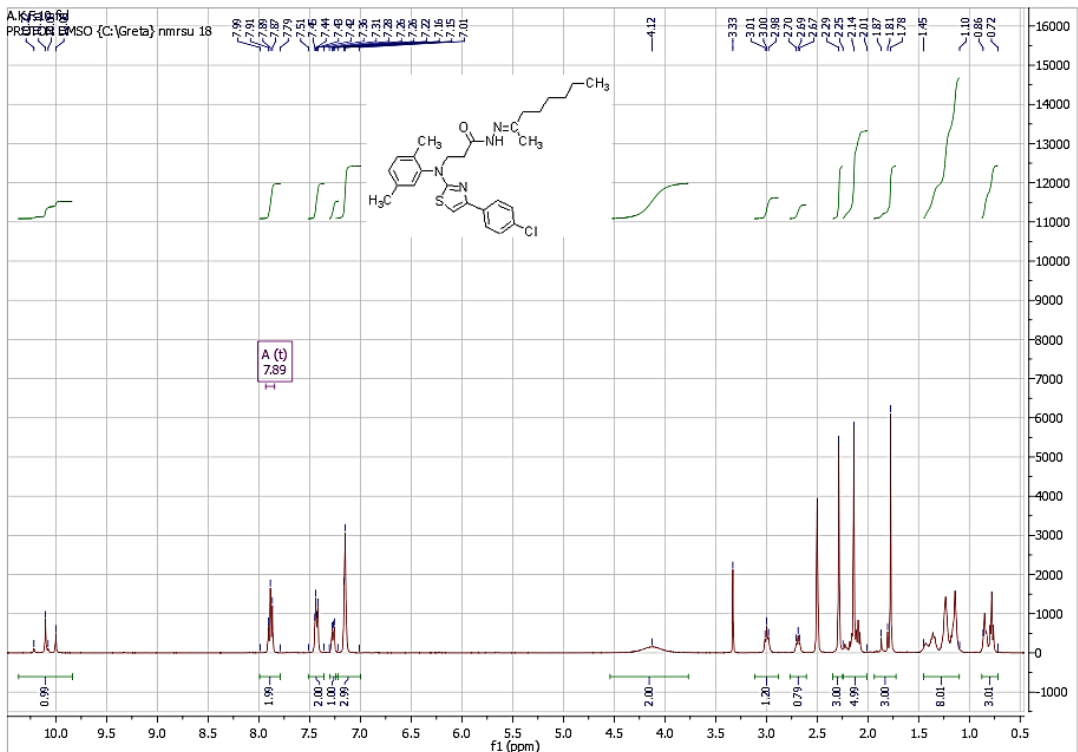

**Figure S54.** <sup>13</sup>C NMR of compound **15f**.

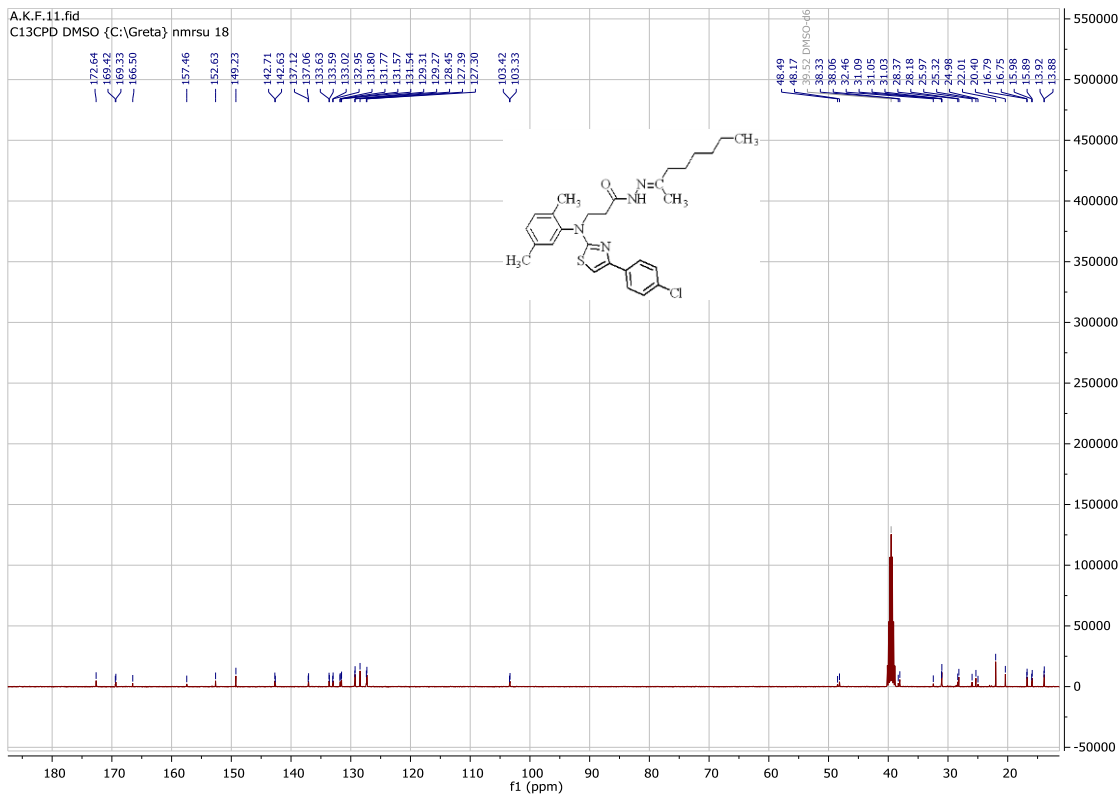

General synthesis of compounds 16c, f, h

*N*-[2-(1*H*-Benzo[*d*]imidazol-2-yl)ethyl]-*N*-(2,5-dimethylphenyl)-4-phenylthiazol-2-amine (**16**)

Figure S55. <sup>1</sup>H NMR of compound 16c.

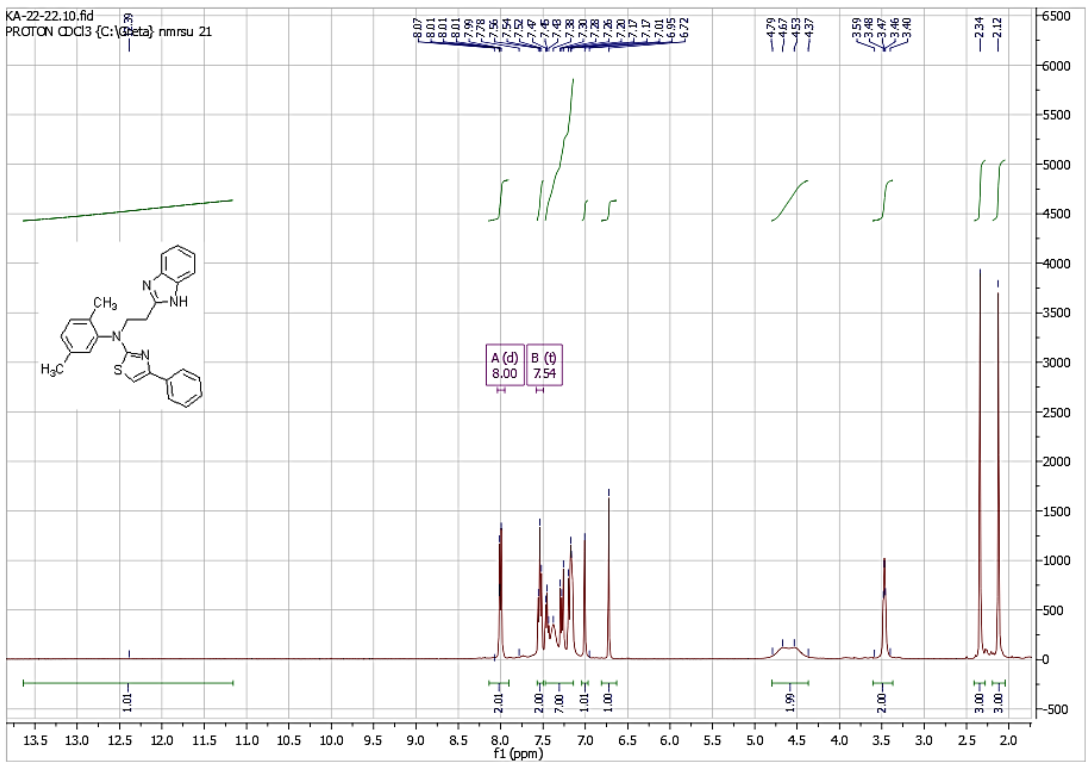

Figure S56. <sup>13</sup>C NMR of compound 16c.

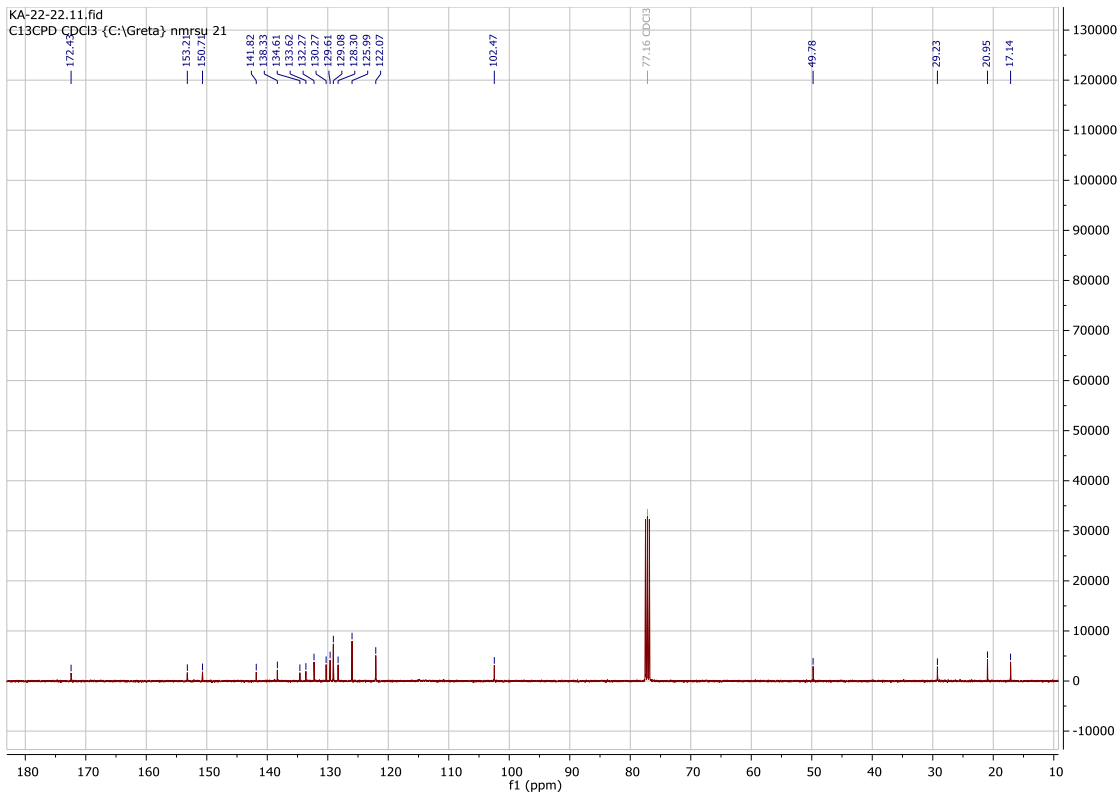

*N*-[2-(1*H*-Benzo[d]imidazol-2-yl)ethyl]-4-(4-chlorophenyl)-*N*-(2,5-dimethylphenyl)thiazol-2-amine (**16f**)  
Figure S57. <sup>1</sup>H NMR of compound **16f**.

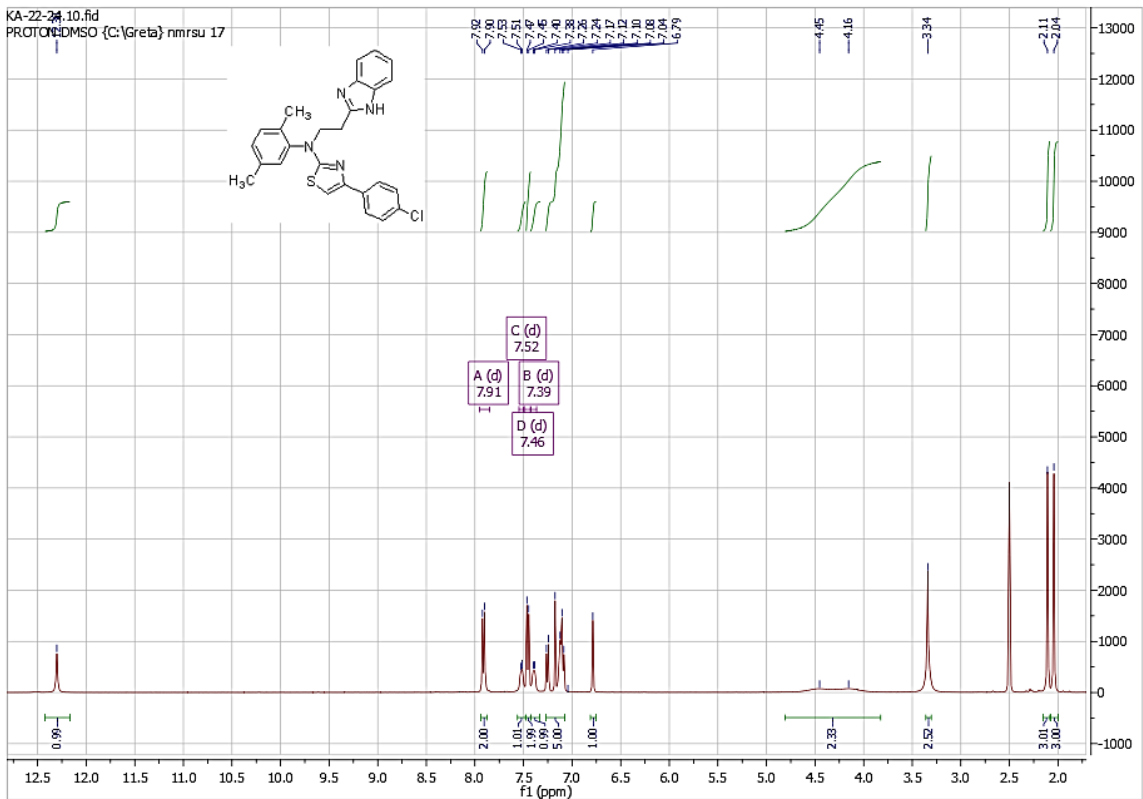

Figure S58. <sup>13</sup>C NMR of compound **16f**.

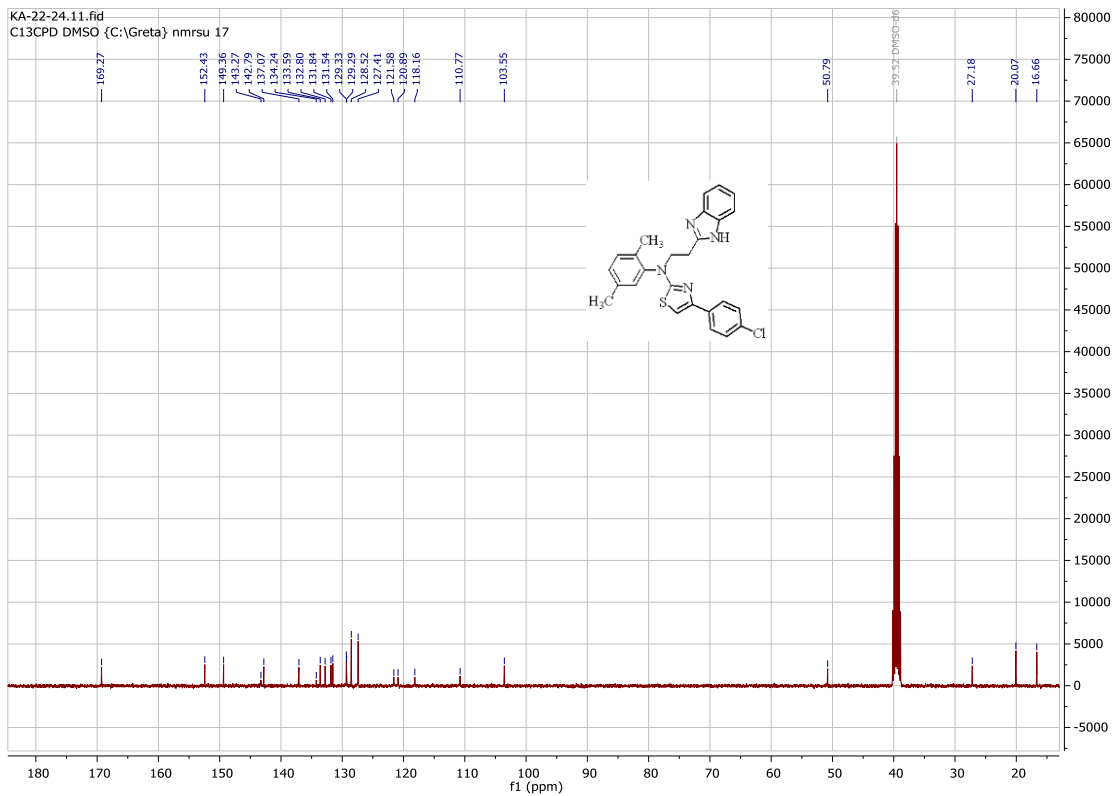

*N*-[2-(1*H*-Benzo[d]imidazol-2-yl)ethyl]-4-(3,4-dichlorophenyl)-*N*-(2,5-dimethylphenyl)thiazol-2-amine (**16h**)  
Figure S59. <sup>1</sup>H NMR of compound **16h**.

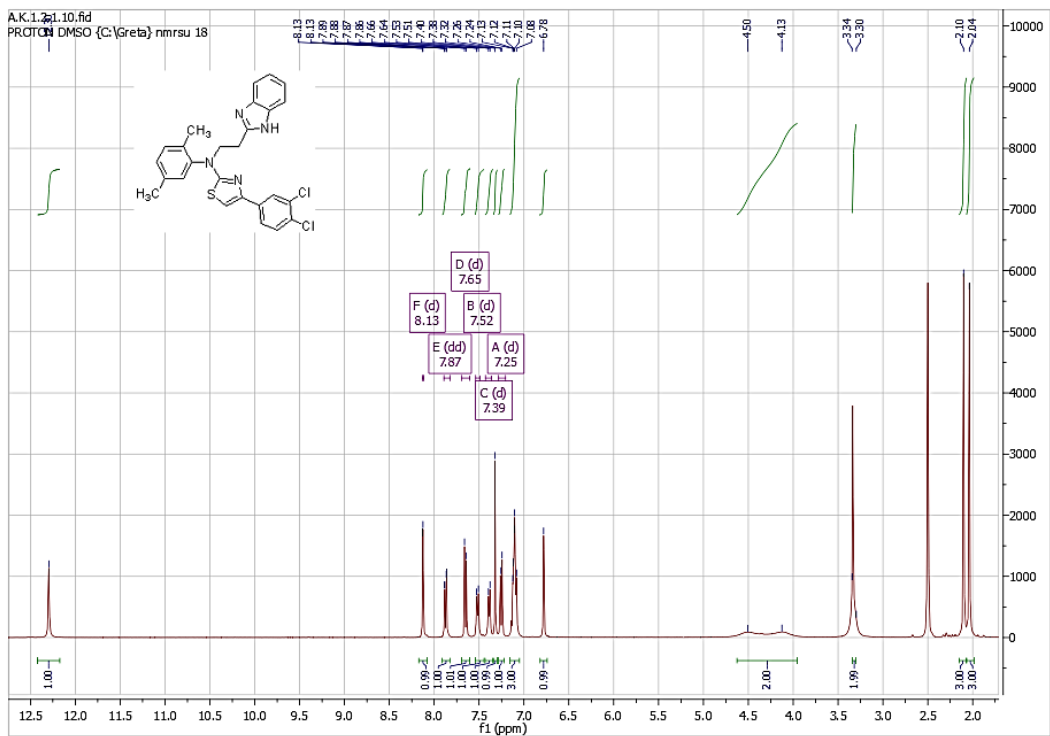

Figure S60. <sup>13</sup>C NMR of compound **16h**.

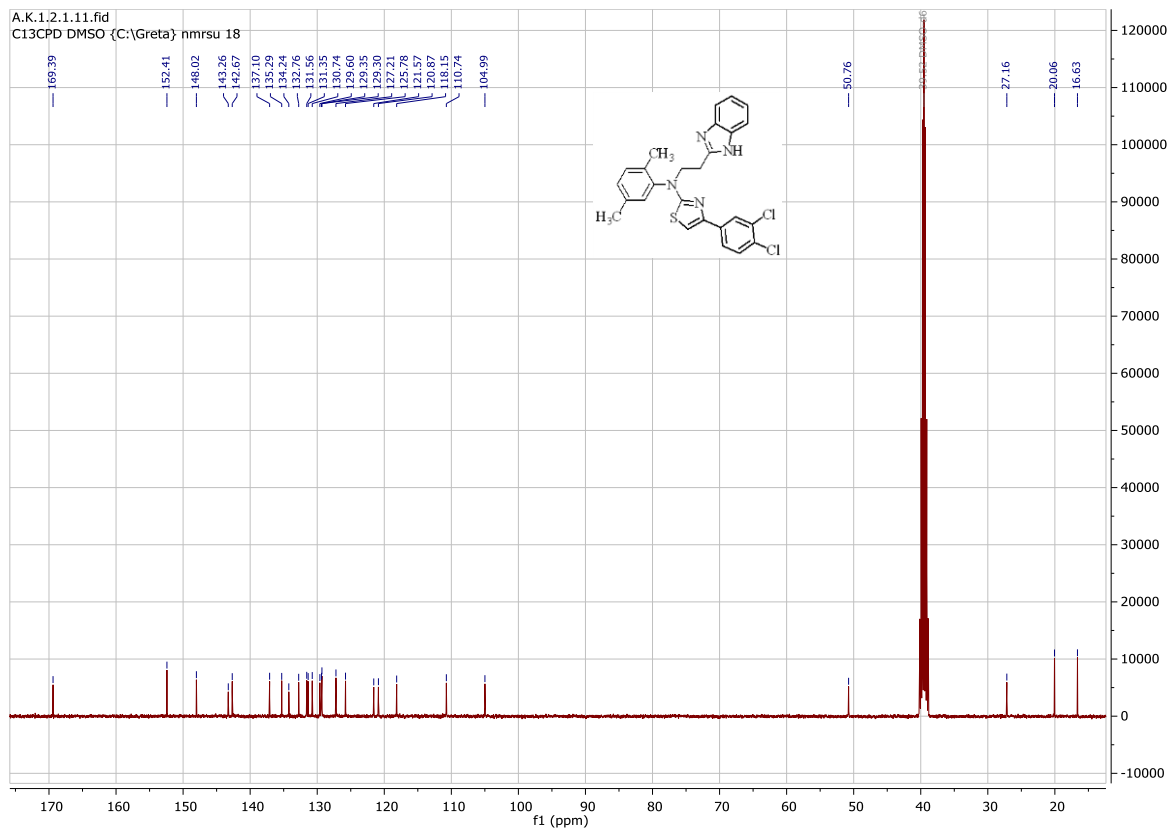

### General synthesis of compounds 17c, f, h

3-[(2,5-Dimethylphenyl)(4-phenylthiazol-2-yl)amino]-N-(4-sulfamoylphenyl)propanamide (17c)

**Figure S61.**  $^1\text{H}$  NMR of compound 17c. A broad peak at 3.33 ppm for water is observed in Figure S61 and identified by chemical shifts reported in the publication [1,2].

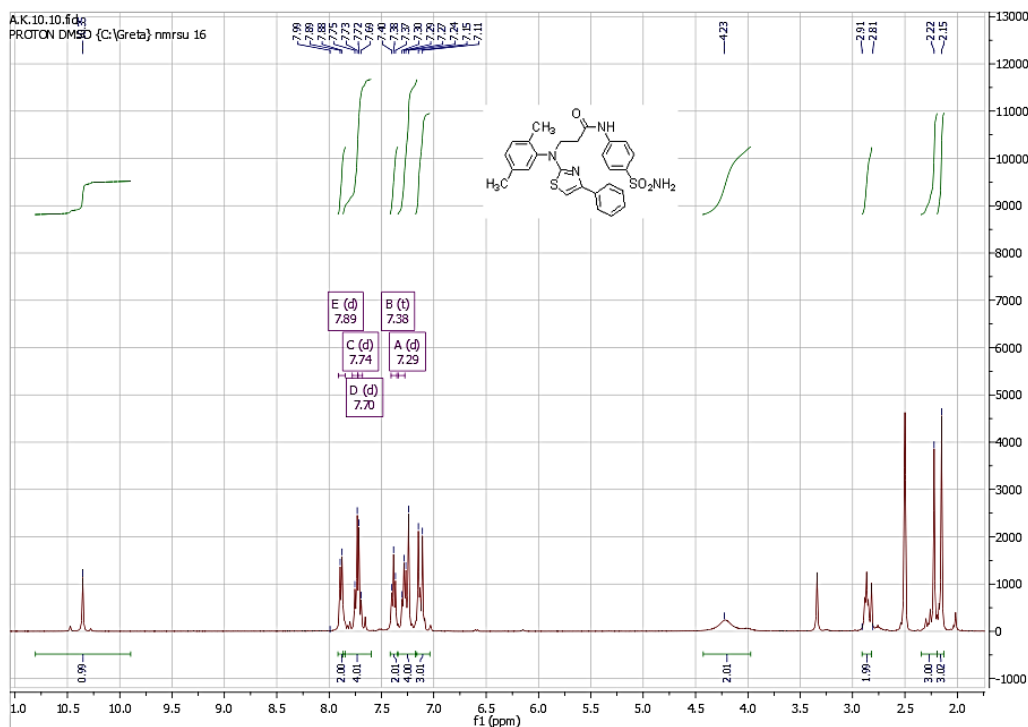

**Figure S62.**  $^{13}\text{C}$  NMR of compound 17c.

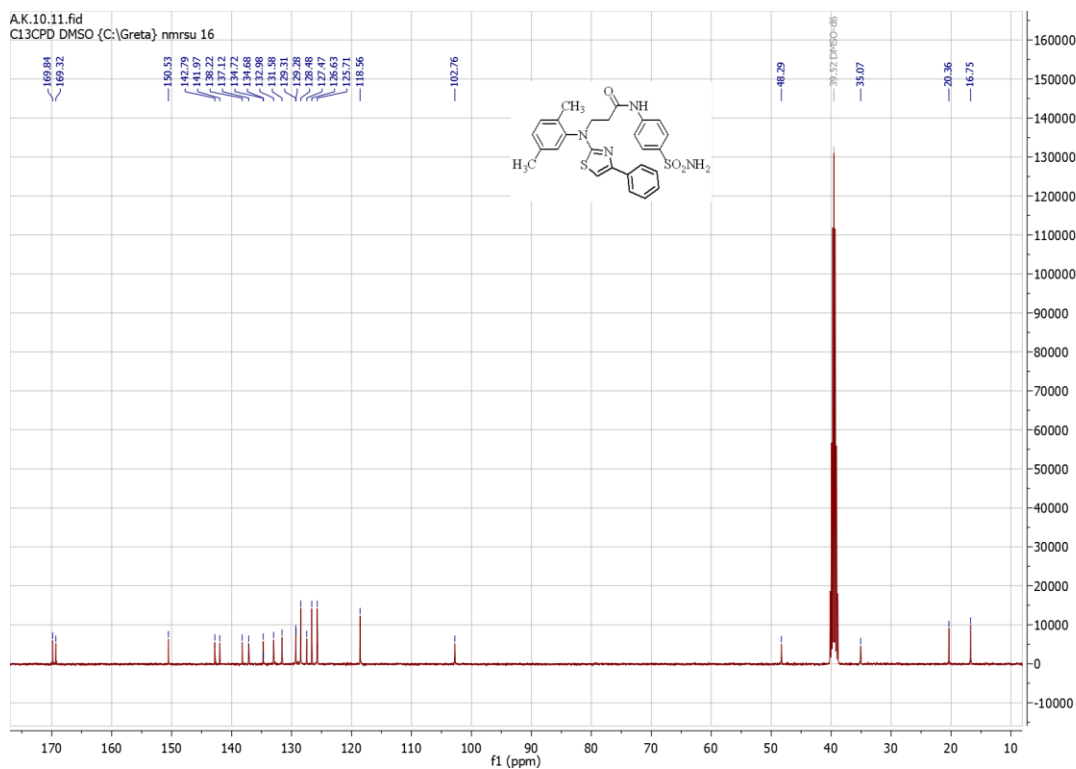

3-[(4-(4-Chlorophenyl)thiazol-2-yl)(2,5-dimethylphenyl)amino]-N-(4-sulfamoylphenyl)propanamide (**17f**)  
**Figure S63.** <sup>1</sup>H NMR of compound **17f**.

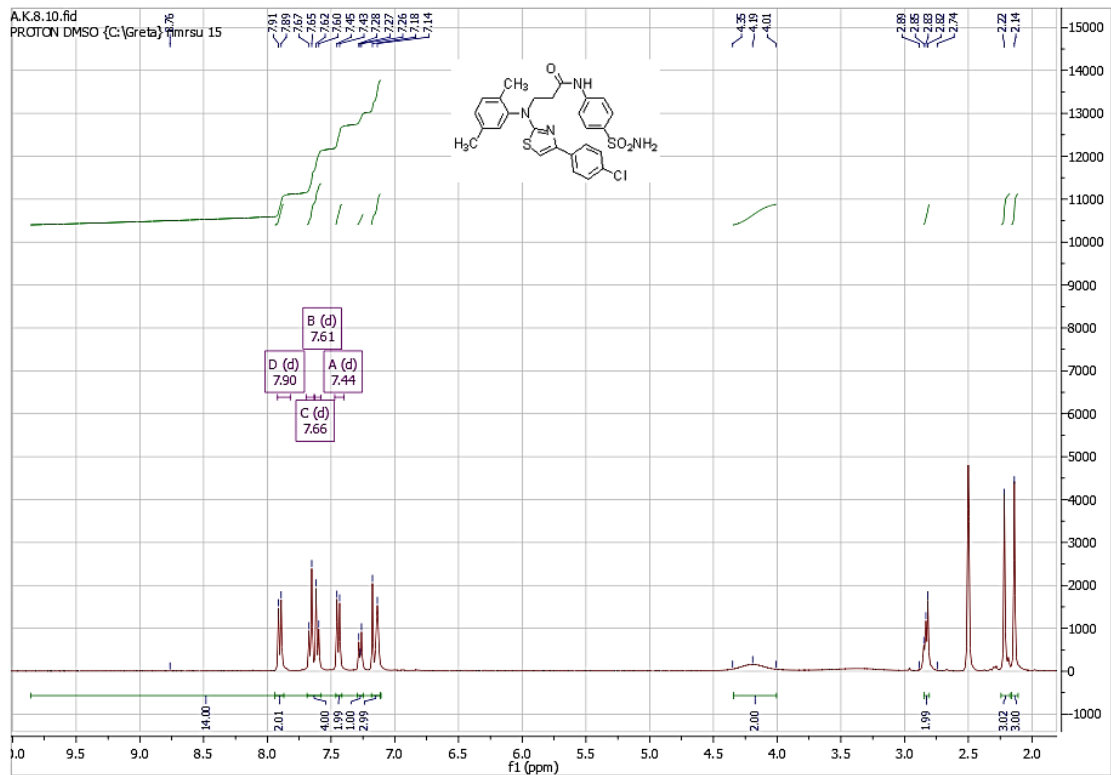

**Figure S64.** <sup>13</sup>C NMR of compound **17f**.

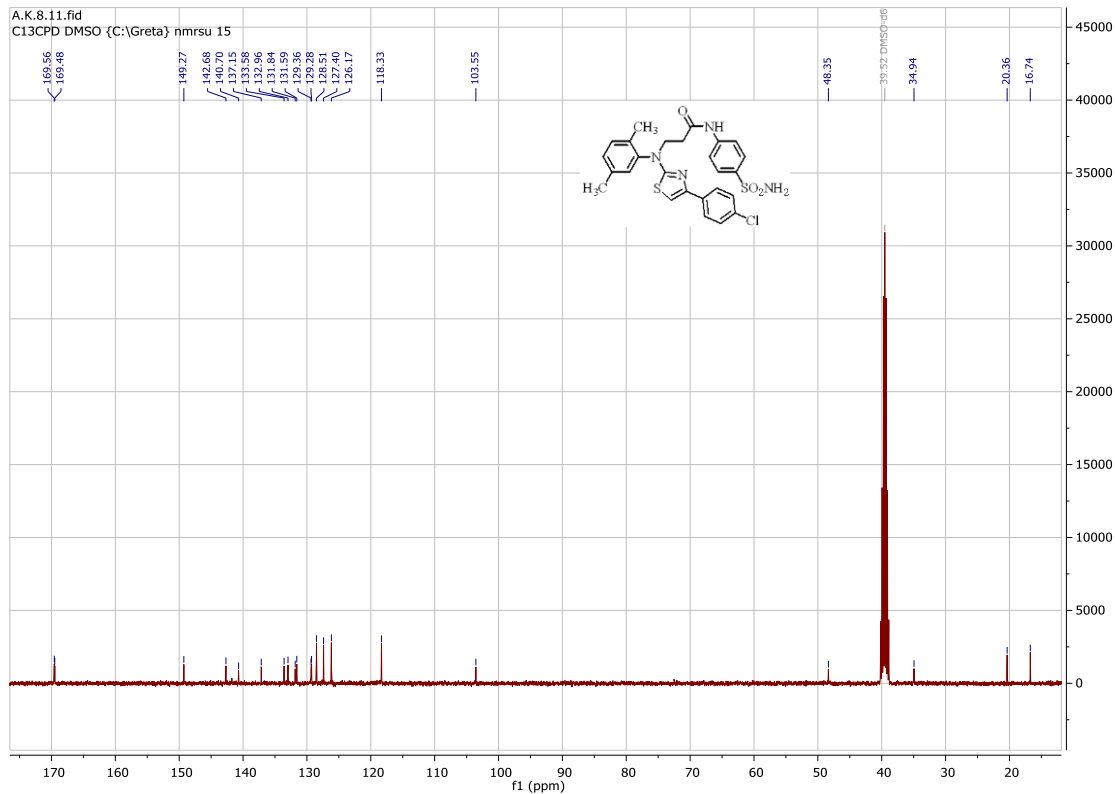

3-((4-(3,4-Dichlorophenyl)thiazol-2-yl)(2,5-dimethylphenyl)amino)-N-(4-sulfamoylphenyl)propanamide (**17h**)

**Figure S65.**  $^1\text{H}$  NMR of compound **17h**. A broad peak at 3.33 ppm for water is observed in Figure S65 and identified by chemical shifts reported in the publication [1,2].

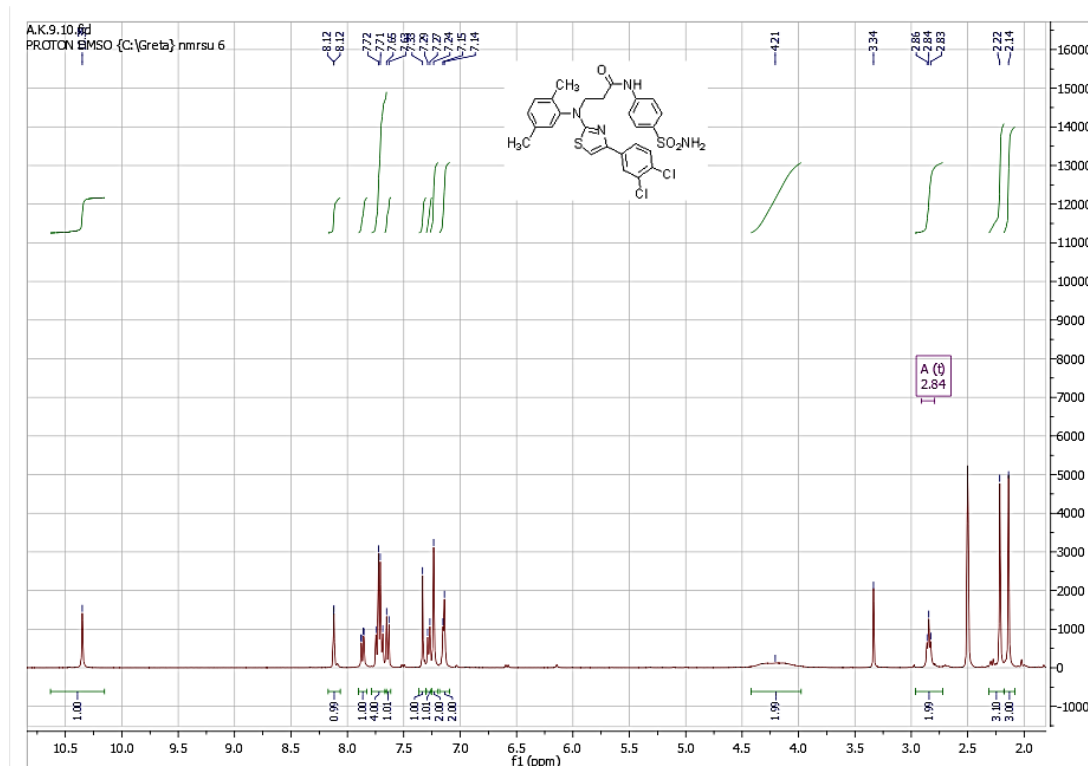

## References

1. Fulmer, G. R.; Miller, A. J. M.; Sherden, N. H.; Gottlieb, H. E.; Nudelman, A.; Stoltz, B. M.; Bercaw, J. E.; Goldberg, K. I. NMR Chemical Shifts of Trace Impurities: Common Laboratory Solvents, Organics, and Gases in Deuterated Solvents Relevant to the Organometallic Chemist. *Organometallics* **2010**, *29*, 2176–2179, doi:10.1021/om100106e.
2. Babij, N. R.; McCusker, E. O.; Whiteker, G. T.; Canturk, B.; Choy, N.; Creemer, L. C.; Amicis, C. V. De; Hewlett, N. M.; Johnson, P. L.; Knobelsdorf, J. A.; et al. NMR Chemical Shifts of Trace Impurities: Industrially Preferred Solvents Used in Process and Green Chemistry. *Org. Process Res. Dev.* **2016**, *20*, 661–667, doi:10.1021/acs.oprd.5b00417.
